# Supplementary material
Source: publisher figshare collection journal article supplement (https://karger.figshare.com/articles/dataset/_/4747909)
Supplement: Supplementary file 1 [file 1]

Archive with 18 entries (18 files):
- HHE360855_Supplementary_Figure_legends_NEW.docx
- Supple Fig 1.jpg
- Supple Fig 2.pdf
- Supple Fig 3a.pdf
- Supple Fig 3b.pdf
- Supple Fig 4.pdf
- Supple Fig 5.pdf
- Supple Fig 6.pdf
- Supple Fig 7.pdf
- Supple Fig 8.pdf
- Supple Fig 9.pdf
- Supple Fig 10.pdf
- Supple Tab 1.PDF
- Supple Tab 2.PDF
- Supple Tab 3.PDF
- Supple Tab 4.PDF
- Supple Tab 5.pdf
- Supple Tab 6.PDF
