# Supplementary material
Source: publisher figshare collection journal article supplement (https://karger.figshare.com/articles/dataset/_/4747909)
Supplement: Supplementary file 1 [file 1 › HHE360855_Supplementary_Figure_legends_NEW.docx]

**Supplementary figure legends**

**Figure S1.** Geographic map of the 145 population samples included in the analyses. To avoid cluttering the map, only two locations were retained for Portugal and Switzerland (Braga and Evora and Bern and Lugano, respectively; see Table S1 for the full list of Portuguese and Swiss samples).

**Figure S2.** Box-and-whisker diagrams of minimum (top figure) and maximum (bottom figure) adjusted p-values for neutrality tests at each locus (2nd field level of resolution). The bottom and top of each box are the 25th and 75th percentiles, respectively, while the band near the middle of the box is the 50th percentile (median). The whiskers represent the lowest/highest data value still within 1.5 IQR (i.e. the interquartile range). Outliers are represented by open circles.

**Figure S3.** Composite NMDS based on Prevosti's genetic distances between pan-European populations for HLA-A, -B, -C and -DRB1 at 1st field level of resolution (a) and for HLA-A, -B, -C, -DRB1 and -DPB1 at 2nd-field level of resolution (b). Symbols are used to differentiate the loci; North African (NAFR), West Asian (WASI), Central-West (CW-EUR), North-East (NE-EUR) and South-East (SE-EUR) European populations are colored in purple, blue, red, orange and green, respectively. Note that we did not include the Indian Munda in these analyses because this population, whose language belongs to the Austro-Asiatic phylum, diverges genetically very much from the others, making most populations overlap in the NMDS.

**Figure S4.** Box-and-whisker diagrams of the maximum log-likelihoods for k=2 to 6 phenotypic profiles after 100 *structure* runs for each predefined number of clusters (see text for explanations).

**Figure S5.** Estimated kernel probability densities of the maximum log-likelihoods for k=2 to 6 phenotypic profiles after 100 *structure* runs for each predefined number of clusters (see text for explanations).

**Figure S6.** Estimated proportions of HLA phenotypic profiles (in different colors) inferred for 4,980 individuals (thin vertical lines) of 25 pan-European populations (separated by black vertical lines) for k=2, k=3 and k=4 clusters. Best clustering: k=4 (see text for explanations). Nomenclature used for each sample: Region (here EUR, NAFR or WASI)-Reference-Number-Population name (see Table S1). Population profiles are shown in Figure 2.

**Figure S7.** Box-and-whisker diagrams of the log-likelihood ratio p-values (top figure) and parametric resampling quantiles (bottom figure) for global linkage disequilibrium tests at each pair of loci (1st field level of resolution). The bottom and top of each box are the 25th and 75th percentiles, respectively, while the band near the middle of the box is the 50th percentile (median). The whiskers represent the lowest/highest data value still within 1.5 IQR (i.e. the interquartile range). Outliers are represented by open circles.

**Figure S8.** Histograms and densities for the standardized residuals of the 5 most common AB haplotypes in Europe for each population sample. The standardized residuals (stdres) were obtained from a χ2 test of independence, they account for the expected haplotype frequencies and hence provide comparable (Gaussian normalised) residuals (Agresti 2007). The contributions are considered significant, or the deviations larger than expected by chance only, if they exceed the value of 1.96, a value that is marked with a vertical red line (dashed black, in the bottom right graph).

**Figure S9.** Spatial autocorrelograms based on the frequencies of six HLA alleles chosen to illustrate clinal (HLA-A*23, B*44, DRB1*15), depression (HLA-A*24) and mixed (HLA-B*14, DRB*16) patterns according to Barbujani's interpretations [58]. Dots indicate significant Moran's I autocorrelations. The analyses were done by using the PASSaGE software (Rosenberg, M.S., and C.D. Anderson: PASSaGE: Pattern Analysis, Spatial Statistics and Geographic Exegesis. Version 2. *Methods in Ecology and Evolution* 2011; 2(3):229-232).

**Figure S10.** Spatial autocorrelograms based on the heterozygosities of six HLA loci (1st-field of resolution). Dots indicate significant Moran's I autocorrelations. A clinal pattern is observed for HLA-A and (to a lesser extent) HLA-B and HLA-C, while the other loci show more random patterns according to Barbujani's interpretations [58]. The analyses were done by using the PASSaGE software (Rosenberg, M.S., and C.D. Anderson: PASSaGE: Pattern Analysis, Spatial Statistics and Geographic Exegesis. Version 2. *Methods in Ecology and Evolution* 2011; 2(3):229-232).
