# Supplementary material
Source: publisher figshare collection journal article supplement (https://karger.figshare.com/articles/dataset/_/4747909)

**HLA-A heterozygosity**

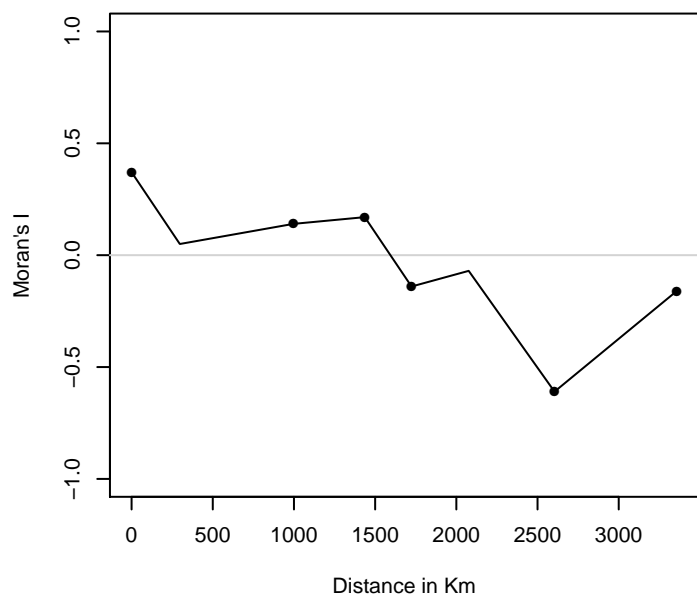

**HLA-B heterozygosity**

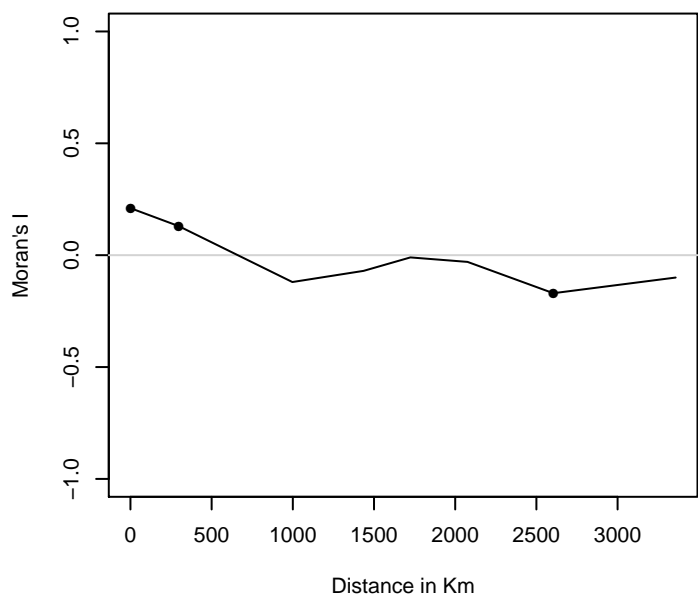

**HLA-C heterozygosity**

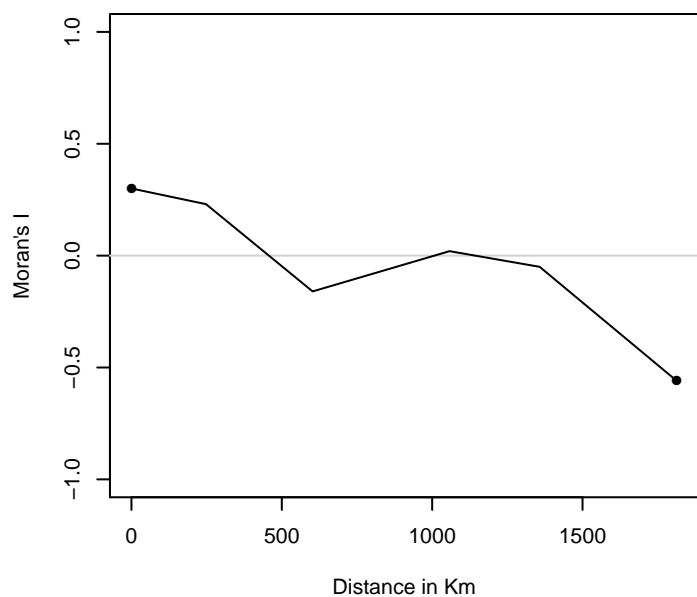

**HLA-DQA1 heterozygosity**

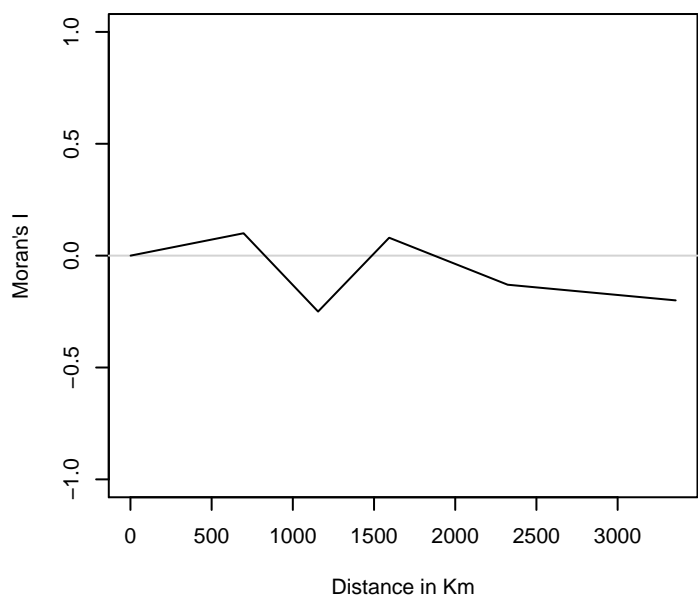

**HLA-DQB1 heterozygosity**

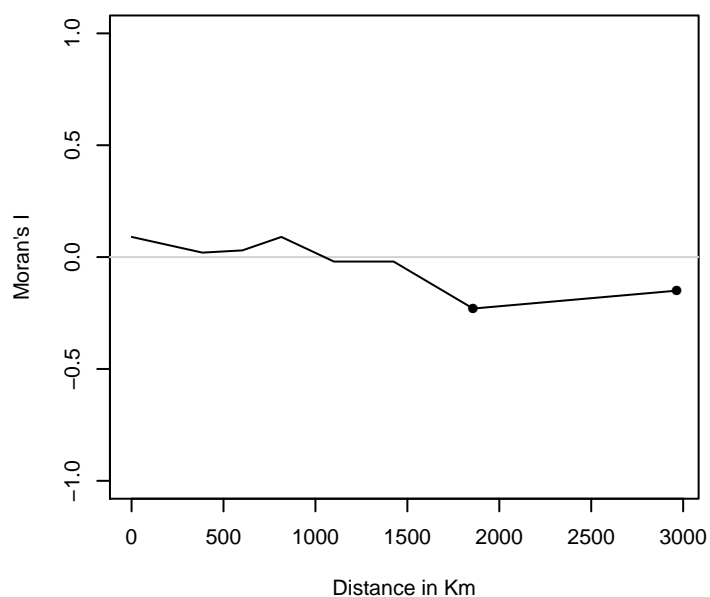

**HLA-DRB1 heterozygosity**

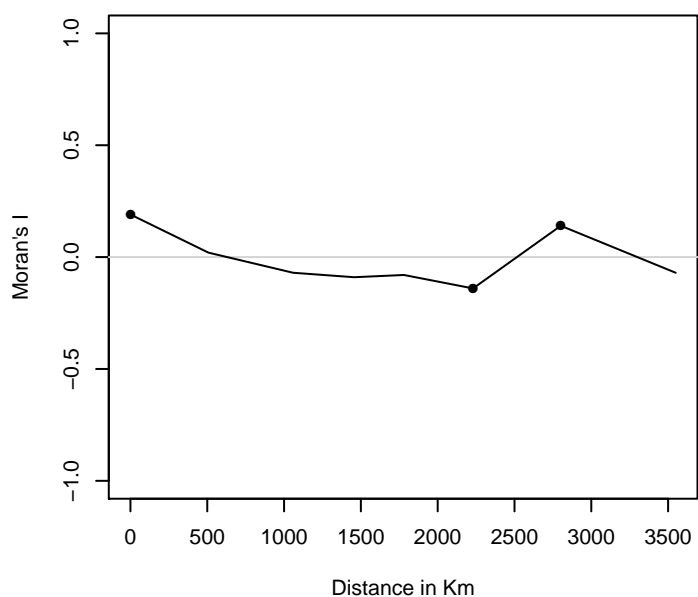

Supplement: Supplementary file 1 [file 1 › Supple Fig 10.pdf]
