# Supplementary material
Source: publisher figshare collection journal article supplement (https://karger.figshare.com/articles/dataset/_/4747909)
Supplement: Supplementary file 1 [file 1 › Supple Tab 1.PDF]

**Table S1:** List and references of the populations analyzed in this study

| Region | Population name             | Number | Reference |
|--------|-----------------------------|--------|-----------|
| CW-EUR | Austrians-Oetztal           | 6      | 15WS      |
|        | Austrians-Vienna            | 5      | 15WS      |
|        | Belgians                    | 158    | 12WS      |
|        | British-Wales               | 27     | 16WS      |
|        | Czechs                      | 22     | 12WS      |
|        | Czechs                      | 32     | 13WS      |
|        | Czechs                      | 41     | 16WS      |
|        | French                      | 229    | 12WS      |
|        | French                      | 28     | 16WS      |
|        | French                      | 61     | 12WS      |
|        | French-Montpellier          | 36     | 16WS      |
|        | Irish                       | 35     | 13WS      |
|        | Polish                      | 156    | 12WS      |
|        | Portuguese                  | 195    | 12WS      |
|        | Portuguese                  | 65     | 12WS      |
|        | Portuguese-Azores           | -      | HLA-NET   |
|        | Portuguese-Aveiro           | -      | HLA-NET   |
|        | Portuguese-Beja             | -      | HLA-NET   |
|        | Portuguese-Braganca         | -      | HLA-NET   |
|        | Portuguese-Braga            | -      | HLA-NET   |
|        | Portuguese-Castelo-Branco   | -      | HLA-NET   |
|        | Portuguese-Coimbra          | -      | HLA-NET   |
|        | Portuguese-Evora            | -      | HLA-NET   |
|        | Portuguese-Faro             | -      | HLA-NET   |
|        | Portuguese-Guarda           | -      | HLA-NET   |
|        | Portuguese-Leiria           | -      | HLA-NET   |
|        | Portuguese-Lisboa           | -      | HLA-NET   |
|        | Portuguese-Madeira          | -      | HLA-NET   |
|        | Portuguese-Portalegre       | -      | HLA-NET   |
|        | Portuguese-Porto            | -      | HLA-NET   |
|        | Portuguese-Santarem         | -      | HLA-NET   |
|        | Portuguese-Setubal          | -      | HLA-NET   |
|        | Portuguese-Viana-do-Castelo | -      | HLA-NET   |
|        | Portuguese-Vila-Real        | -      | HLA-NET   |
|        | Portuguese-Viseu            | -      | HLA-NET   |

| Region | Population name        | Number | Reference |
|--------|------------------------|--------|-----------|
| NE-EUR | Spanish                | 104    | 12WS      |
|        | Spanish                | 48     | 16WS      |
|        | Spanish                | 82     | 12WS      |
|        | Spanish-Basques        | 120    | 12WS      |
|        | Swiss                  | 196    | 12WS      |
|        | Swiss-BMD-BE           | -      | 16WS      |
|        | Swiss-BMD-GE           | -      | 16WS      |
|        | Swiss-BMD-GR           | -      | 16WS      |
|        | Swiss-BMD-LG           | -      | 16WS      |
|        | Swiss-BMD-LS           | -      | 16WS      |
|        | Swiss-BMD-LU           | -      | 16WS      |
|        | Swiss-BMD-SG           | -      | 16WS      |
|        | Swiss-BMD-SI           | -      | 16WS      |
|        | Swiss                  | -      | AGP       |
|        | Bashkirs               | 55     | 16WS      |
|        | Belorussians-Brest     | 7      | 16WS      |
| NE-EUR | Belorussians-Gomel     | 5      | 16WS      |
|        | Belorussians-Vitebsk   | 6      | 16WS      |
|        | Finns                  | 33     | 13WS      |
|        | Finns                  | 42     | 16WS      |
|        | Finns-BMD              | 39     | 16WS      |
|        | Finns-CB               | 38     | 16WS      |
|        | Kalmyks-El-Mari        | 8      | 16WS      |
|        | Kalmyks-Kalmikia       | 9      | 16WS      |
|        | Nenets                 | 11     | 16WS      |
|        | Russians               | 53     | 16WS      |
|        | Russians-Arkhangelsk   | 12     | 16WS      |
|        | Russians-Kostroma      | 14     | 16WS      |
|        | Russians-Smolensk      | 13     | 16WS      |
|        | Russians-Vologda       | 15     | 16WS      |
|        | Saami                  | 16     | 16WS      |
|        | Tatars                 | 17     | 16WS      |
| NE-EUR | Tatars                 | 54     | 16WS      |
|        | Udmurts                | 19     | 16WS      |
|        | Ukrainians-Khmelnitsky | 20     | 16WS      |
|        | Ukrainians-Lvov        | 21     | 16WS      |

| Region | Population name   | Number | Reference     |
|--------|-------------------|--------|---------------|
| SE-EUR | Albanians         | 20     | 15WS          |
|        | Bulgarians        | 119    | 12WS          |
|        | Croatians         | 19     | 12WS          |
|        | Croatians         | 20     | 12WS          |
|        | Croatians         | 21     | 12WS          |
|        | Croatians         | 31     | 13WS          |
|        | Croatians         | 37     | 16WS          |
|        | Cypriots          | 46     | 16WS          |
|        | Greek-Cypriots    | 166    | 12WS          |
|        | Greeks            | 12     | 15WS          |
|        | Greeks            | 165    | 12WS          |
|        | Greeks            | 34     | 12WS          |
|        | Greeks            | 44     | 16WS          |
|        | Italians          | 42     | 12WS          |
|        | Italians          | 45     | 12WS          |
|        | Kosovo-Albanians  | 52     | 16WS          |
|        | Macedonians       | 19     | 15WS          |
|        | Northern-Italians | 45     | 16WS          |
|        | Pomaki            | 164    | 12WS          |
|        | Romanians         | 67     | 12WS          |
|        | Sardinians        | 46     | 12WS          |
|        | Slovenian-Donors  | 58     | 16WS          |
|        | Slovenians        | 36     | 13WS          |
|        | Slovenians        | 57     | 16WS          |
|        | Slovenians-CB     | 59     | 16WS          |
| NAFR   | Algerians         | 17     | 13WS          |
|        | Algerians         | 55     | 12WS          |
|        | Algerians-Oran    | 1      | 15WS          |
|        | Bedouins          | 171    | 12WS          |
|        | Chaouya           | 2      | 15WS          |
|        | Egyptian-Copts    | -      | Other-sources |
|        | Egyptians         | 3      | 16WS          |
|        | Egyptians-Delta   | -      | Other-sources |
|        | Egyptians-South   | -      | Other-sources |
|        | Gabes             | -      | Other-sources |
|        | Jerba             | -      | Other-sources |

| Region | Population name     | Number | Reference     |
|--------|---------------------|--------|---------------|
| WASI   | Matmata             | -      | Other-sources |
|        | Metalsa             | 13     | 15WS          |
|        | Moroccans           | 20     | 13WS          |
|        | Moroccans           | 21     | 13WS          |
|        | Mzab                | -      | Other-sources |
|        | Sudanese            | 35     | 16WS          |
|        | Tunisians-Sened     | 3      | 15WS          |
|        | Tunisians           | -      | Other-sources |
|        | Tunisians-Tataouine | 4      | 15WS          |
|        | Ashkenazi-Jews      | 116    | 12WS          |
|        | Druzes              | 58     | 13WS          |
|        | Georgians           | 34     | 13WS          |
|        | Hazara              | 22     | 16WS          |
|        | Hunza-Burushaski    | 214    | 12WS          |
|        | Indians-Golla       | 63     | 13WS          |
|        | Indians-New-Dehli   | 61     | 13WS          |
|        | Iranians            | -      | AGP           |
|        | Iraqi-Kurdistan     | 2      | 16WS          |
|        | Israeli-Jews        | 59     | 13WS          |
| WASI   | Kurdish             | 60     | 13WS          |
|        | Lebanese            | -      | AGP           |
|        | Libanese            | 145    | 12WS          |
|        | Libyan-Jews         | 153    | 12WS          |
|        | Morrocan-Jews       | 117    | 12WS          |
|        | Munda               | 14     | 15WS          |
|        | Northern-Indians    | 43     | 16WS          |
|        | Omani               | 62     | 13WS          |
|        | Ouzbeck             | 23     | 16WS          |
|        | Pachtoun            | 24     | 16WS          |
|        | Pathans             | 219    | 12WS          |
|        | Punjabi             | 38     | 12WS          |
|        | Sindhi              | 213    | 12WS          |
|        | Syrians             | 1      | 16WS          |
|        | Tadjik              | 25     | 16WS          |
| WASI   | Tamil               | 64     | 13WS          |
|        | Turkmen             | 26     | 16WS          |
|        | Turks               | 65     | 13WS          |

| Region | Population name | Number | Reference |
|--------|-----------------|--------|-----------|
| OTH    | Czech-Gypsies   | 23     | 12WS      |

12WS: detailed description of the populations is available in Bodmer et al. (1997)

13WS: detailed description of the populations is available in Mack et al. (2006)

15WS: detailed description of the populations is available in Nunes et al. (2010)

16WS: detailed description of the populations is available in Riccio et al. (2013)

AGP: detailed description of the populations is available in Buhler et al. (2002,2006)

Other-sources: detailed description of the populations is available in Hors et al. (1997)  
and Abdennaji Guenounou et al. (2006)

HLA-NET: detailed description of the populations is available in [www.allelefreqencies.net](http://www.allelefreqencies.net)
