# Supplementary material
Source: publisher figshare collection journal article supplement (https://karger.figshare.com/articles/dataset/_/4747909)
Supplement: Supplementary file 1 [file 1 › Supple Tab 2.PDF]

**Table S2:** Genetic diversity among pan-European (EUR-NAFR-WASI) and European (EUR) populations

| Locus | 1st-field     |                 |        |     |                 |        | 2nd-field     |                 |        |     |                 |        |
|-------|---------------|-----------------|--------|-----|-----------------|--------|---------------|-----------------|--------|-----|-----------------|--------|
|       | EUR-NAFR-WASI |                 |        | EUR |                 |        | EUR-NAFR-WASI |                 |        | EUR |                 |        |
|       | N             | F <sub>ST</sub> | p      | N   | F <sub>ST</sub> | p      | N             | F <sub>ST</sub> | p      | N   | F <sub>ST</sub> | p      |
| A     | 75            | 0.004           | <1e-05 | 58  | 0.004           | <1e-05 | 26            | 0.020           | <1e-05 | 13  | 0.009           | <1e-05 |
| B     | 79            | 0.006           | <1e-05 | 58  | 0.005           | <1e-05 | 30            | 0.025           | <1e-05 | 13  | 0.019           | <1e-05 |
| C     | 44            | 0.011           | <1e-05 | 27  | 0.008           | <1e-05 | 22            | 0.018           | <1e-05 | 10  | 0.016           | <1e-05 |
| DPB1  | -             | -               | -      | -   | -               | -      | 17            | 0.017           | <1e-05 | 13  | 0.010           | <1e-05 |
| DQA1  | 26            | 0.021           | <1e-05 | 19  | 0.020           | <1e-05 | 22            | 0.020           | <1e-05 | 15  | 0.015           | <1e-05 |
| DQB1  | 67            | 0.019           | <1e-05 | 45  | 0.018           | <1e-05 | 49            | 0.030           | <1e-05 | 30  | 0.030           | <1e-05 |
| DRB1  | 113           | 0.008           | <1e-05 | 83  | 0.007           | <1e-05 | 44            | 0.019           | <1e-05 | 25  | 0.017           | <1e-05 |

N: number of populations tested

p: F<sub>ST</sub> p-value (10000 permutations)
