# Supplementary material
Source: publisher figshare collection journal article supplement (https://karger.figshare.com/articles/dataset/_/4747909)
Supplement: Supplementary file 1 [file 1 › Supple Tab 3.PDF]

Table S3: Estimated allele frequencies in each phenotypic profile

| K=2                  |       |      |       |         |       |                      |       |      |       |         |       |
|----------------------|-------|------|-------|---------|-------|----------------------|-------|------|-------|---------|-------|
| Phenotypic profile 1 |       |      |       |         |       | Phenotypic profile 2 |       |      |       |         |       |
| A*02                 | 0.299 | B*44 | 0.092 | DRB1*12 | 0.024 | A*02                 | 0.245 | B*44 | 0.125 | DRB1*12 | 0.008 |
| A*24                 | 0.137 | B*18 | 0.081 | DRB1*07 | 0.047 | A*24                 | 0.078 | B*18 | 0.048 | DRB1*07 | 0.206 |
| A*25                 | 0.022 | B*40 | 0.066 | DRB1*11 | 0.225 | A*25                 | 0.019 | B*40 | 0.035 | DRB1*11 | 0.111 |
| A*01                 | 0.038 | B*15 | 0.067 | DRB1*01 | 0.105 | A*01                 | 0.247 | B*15 | 0.045 | DRB1*01 | 0.067 |
| A*03                 | 0.156 | B*37 | 0.006 | DRB1*14 | 0.056 | A*03                 | 0.099 | B*37 | 0.025 | DRB1*14 | 0.028 |
| A*68                 | 0.045 | B*39 | 0.03  | DRB1*04 | 0.139 | A*68                 | 0.036 | B*39 | 0.015 | DRB1*04 | 0.099 |
| A*23                 | 0.015 | B*13 | 0.006 | DRB1*15 | 0.143 | A*23                 | 0.029 | B*13 | 0.062 | DRB1*15 | 0.096 |
| A*29                 | 0.018 | B*38 | 0.036 | DRB1*13 | 0.129 | A*29                 | 0.037 | B*38 | 0.02  | DRB1*13 | 0.103 |
| A*26                 | 0.05  | B*51 | 0.132 | DRB1*08 | 0.044 | A*26                 | 0.029 | B*51 | 0.054 | DRB1*08 | 0.022 |
| A*32                 | 0.054 | B*07 | 0.111 | DRB1*03 | 0.009 | A*32                 | 0.03  | B*07 | 0.073 | DRB1*03 | 0.213 |
| A*30                 | 0.01  | B*56 | 0.009 | DRB1*16 | 0.055 | A*30                 | 0.059 | B*56 | 0.003 | DRB1*16 | 0.02  |
| A*31                 | 0.031 | B*35 | 0.165 | DRB1*10 | 0.01  | A*31                 | 0.021 | B*35 | 0.073 | DRB1*10 | 0.023 |
| A*66                 | 0.004 | B*49 | 0.021 | DRB1*09 | 0.012 | A*66                 | 0.004 | B*49 | 0.02  | DRB1*09 | 0.005 |
| A*11                 | 0.09  | B*47 | 0.004 |         |       | A*11                 | 0.041 | B*47 | 0.005 |         |       |
| A*69                 | 0.004 | B*08 | 0     |         |       | A*69                 | 0.002 | B*08 | 0.166 |         |       |
| A*33                 | 0.024 | B*57 | 0.003 |         |       | A*33                 | 0.022 | B*57 | 0.057 |         |       |
| A*34                 | 0.001 | B*27 | 0.041 |         |       | A*34                 | 0.002 | B*27 | 0.017 |         |       |
| A*74                 | 0.001 | B*41 | 0.011 |         |       | A*74                 | 0     | B*41 | 0.023 |         |       |
| A*43                 | 0     | B*55 | 0.024 |         |       | A*43                 | 0     | B*55 | 0.01  |         |       |
| A*36                 | 0     | B*14 | 0.032 |         |       | A*36                 | 0     | B*14 | 0.03  |         |       |
| A*80                 | 0     | B*50 | 0.005 |         |       | A*80                 | 0     | B*50 | 0.033 |         |       |
|                      |       | B*58 | 0.014 |         |       |                      |       | B*58 | 0.019 |         |       |
|                      |       | B*45 | 0.004 |         |       |                      |       | B*45 | 0.008 |         |       |
|                      |       | B*53 | 0.004 |         |       |                      |       | B*53 | 0.01  |         |       |
|                      |       | B*52 | 0.028 |         |       |                      |       | B*52 | 0.016 |         |       |
|                      |       | B*48 | 0.003 |         |       |                      |       | B*48 | 0.002 |         |       |
|                      |       | B*73 | 0.002 |         |       |                      |       | B*73 | 0.002 |         |       |
|                      |       | B*82 | 0     |         |       |                      |       | B*82 | 0     |         |       |
|                      |       | B*78 | 0.001 |         |       |                      |       | B*78 | 0     |         |       |
|                      |       | B*54 | 0.001 |         |       |                      |       | B*54 | 0     |         |       |
|                      |       | B*42 | 0     |         |       |                      |       | B*42 | 0.003 |         |       |
|                      |       | B*46 | 0.002 |         |       |                      |       | B*46 | 0     |         |       |
|                      |       | B*81 | 0     |         |       |                      |       | B*81 | 0     |         |       |

Table S3: Estimated allele frequencies in each phenotypic profile (continued)

| K=3                  |       |      |       |         |       |                      |       |      |       |         |       |                      |       |      |       |         |       |
|----------------------|-------|------|-------|---------|-------|----------------------|-------|------|-------|---------|-------|----------------------|-------|------|-------|---------|-------|
| Phenotypic profile 1 |       |      |       |         |       | Phenotypic profile 2 |       |      |       |         |       | Phenotypic profile 3 |       |      |       |         |       |
| A*02                 | 0.254 | B*44 | 0.11  | DRB1*12 | 0.019 | A*02                 | 0.349 | B*44 | 0.102 | DRB1*12 | 0.025 | A*02                 | 0.207 | B*44 | 0.112 | DRB1*12 | 0.005 |
| A*24                 | 0.11  | B*18 | 0.037 | DRB1*07 | 0.092 | A*24                 | 0.147 | B*18 | 0.106 | DRB1*07 | 0.112 | A*24                 | 0.063 | B*18 | 0.049 | DRB1*07 | 0.172 |
| A*25                 | 0.02  | B*40 | 0.059 | DRB1*11 | 0.113 | A*25                 | 0.017 | B*40 | 0.057 | DRB1*11 | 0.297 | A*25                 | 0.024 | B*40 | 0.038 | DRB1*11 | 0.088 |
| A*01                 | 0.044 | B*15 | 0.059 | DRB1*01 | 0.159 | A*01                 | 0.047 | B*15 | 0.068 | DRB1*01 | 0.038 | A*01                 | 0.341 | B*15 | 0.04  | DRB1*01 | 0.065 |
| A*03                 | 0.234 | B*37 | 0.005 | DRB1*14 | 0.044 | A*03                 | 0.067 | B*37 | 0.011 | DRB1*14 | 0.058 | A*03                 | 0.085 | B*37 | 0.031 | DRB1*14 | 0.023 |
| A*68                 | 0.034 | B*39 | 0.012 | DRB1*04 | 0.146 | A*68                 | 0.054 | B*39 | 0.042 | DRB1*04 | 0.12  | A*68                 | 0.033 | B*39 | 0.012 | DRB1*04 | 0.092 |
| A*23                 | 0.009 | B*13 | 0.018 | DRB1*15 | 0.254 | A*23                 | 0.029 | B*13 | 0.044 | DRB1*15 | 0.017 | A*23                 | 0.027 | B*13 | 0.035 | DRB1*15 | 0.093 |
| A*29                 | 0.027 | B*38 | 0.019 | DRB1*13 | 0.098 | A*29                 | 0.026 | B*38 | 0.046 | DRB1*13 | 0.154 | A*29                 | 0.029 | B*38 | 0.018 | DRB1*13 | 0.093 |
| A*26                 | 0.034 | B*51 | 0.064 | DRB1*08 | 0.028 | A*26                 | 0.057 | B*51 | 0.175 | DRB1*08 | 0.052 | A*26                 | 0.027 | B*51 | 0.035 | DRB1*08 | 0.017 |
| A*32                 | 0.038 | B*07 | 0.216 | DRB1*03 | 0.009 | A*32                 | 0.06  | B*07 | 0.001 | DRB1*03 | 0.02  | A*32                 | 0.027 | B*07 | 0.064 | DRB1*03 | 0.311 |
| A*30                 | 0.012 | B*56 | 0.009 | DRB1*16 | 0.02  | A*30                 | 0.042 | B*56 | 0.007 | DRB1*16 | 0.075 | A*30                 | 0.047 | B*56 | 0.002 | DRB1*16 | 0.016 |
| A*31                 | 0.027 | B*35 | 0.158 | DRB1*10 | 0.009 | A*31                 | 0.031 | B*35 | 0.141 | DRB1*10 | 0.018 | A*31                 | 0.02  | B*35 | 0.058 | DRB1*10 | 0.023 |
| A*66                 | 0.003 | B*49 | 0.01  | DRB1*09 | 0.008 | A*66                 | 0.006 | B*49 | 0.031 | DRB1*09 | 0.013 | A*66                 | 0.002 | B*49 | 0.019 | DRB1*09 | 0.003 |
| A*11                 | 0.11  | B*47 | 0.006 |         |       | A*11                 | 0.052 | B*47 | 0.005 |         |       | A*11                 | 0.036 | B*47 | 0.004 |         |       |
| A*69                 | 0.002 | B*08 | 0     |         |       | A*69                 | 0.005 | B*08 | 0     |         |       | A*69                 | 0.002 | B*08 | 0.257 |         |       |
| A*33                 | 0.039 | B*57 | 0.013 |         |       | A*33                 | 0.007 | B*57 | 0.014 |         |       | A*33                 | 0.025 | B*57 | 0.064 |         |       |
| A*34                 | 0.001 | B*27 | 0.044 |         |       | A*34                 | 0.001 | B*27 | 0.03  |         |       | A*34                 | 0.002 | B*27 | 0.014 |         |       |
| A*74                 | 0     | B*41 | 0.004 |         |       | A*74                 | 0.002 | B*41 | 0.026 |         |       | A*74                 | 0     | B*41 | 0.02  |         |       |
| A*43                 | 0     | B*55 | 0.024 |         |       | A*43                 | 0     | B*55 | 0.018 |         |       | A*43                 | 0     | B*55 | 0.01  |         |       |
| A*36                 | 0     | B*14 | 0.059 |         |       | A*36                 | 0     | B*14 | 0.005 |         |       | A*36                 | 0.001 | B*14 | 0.03  |         |       |
| A*80                 | 0     | B*50 | 0.008 |         |       | A*80                 | 0     | B*50 | 0.019 |         |       | A*80                 | 0     | B*50 | 0.029 |         |       |
|                      |       | B*58 | 0.013 |         |       |                      |       | B*58 | 0.013 |         |       |                      |       | B*58 | 0.023 |         |       |
|                      |       | B*45 | 0.002 |         |       |                      |       | B*45 | 0.01  |         |       |                      |       | B*45 | 0.005 |         |       |
|                      |       | B*53 | 0.001 |         |       |                      |       | B*53 | 0.011 |         |       |                      |       | B*53 | 0.01  |         |       |
|                      |       | B*52 | 0.05  |         |       |                      |       | B*52 | 0.001 |         |       |                      |       | B*52 | 0.017 |         |       |
|                      |       | B*48 | 0.001 |         |       |                      |       | B*48 | 0.006 |         |       |                      |       | B*48 | 0     |         |       |
|                      |       | B*73 | 0.001 |         |       |                      |       | B*73 | 0.003 |         |       |                      |       | B*73 | 0.002 |         |       |
|                      |       | B*82 | 0     |         |       |                      |       | B*82 | 0     |         |       |                      |       | B*82 | 0     |         |       |
|                      |       | B*78 | 0     |         |       |                      |       | B*78 | 0.001 |         |       |                      |       | B*78 | 0     |         |       |
|                      |       | B*54 | 0     |         |       |                      |       | B*54 | 0.001 |         |       |                      |       | B*54 | 0     |         |       |
|                      |       | B*42 | 0     |         |       |                      |       | B*42 | 0.001 |         |       |                      |       | B*42 | 0.003 |         |       |
|                      |       | B*46 | 0     |         |       |                      |       | B*46 | 0.003 |         |       |                      |       | B*46 | 0     |         |       |
|                      |       | B*81 | 0     |         |       |                      |       | B*81 | 0     |         |       |                      |       | B*81 | 0     |         |       |

Table S3: Estimated allele frequencies in each phenotypic profile (continued)

K=4

| Phenotypic profile 1 |       |      |       |         |       | Phenotypic profile 2 |       |      |       |         |       | Phenotypic profile 3 |       |      |       |         |       | Phenotypic profile 4 |       |      |       |         |       |
|----------------------|-------|------|-------|---------|-------|----------------------|-------|------|-------|---------|-------|----------------------|-------|------|-------|---------|-------|----------------------|-------|------|-------|---------|-------|
| A*02                 | 0.225 | B*44 | 0.079 | DRB1*12 | 0.016 | A*02                 | 0.33  | B*44 | 0.055 | DRB1*12 | 0.027 | A*02                 | 0.174 | B*44 | 0.077 | DRB1*12 | 0.003 | A*02                 | 0.353 | B*44 | 0.22  | DRB1*12 | 0.019 |
| A*24                 | 0.107 | B*18 | 0.031 | DRB1*07 | 0.048 | A*24                 | 0.171 | B*18 | 0.143 | DRB1*07 | 0.005 | A*24                 | 0.059 | B*18 | 0.062 | DRB1*07 | 0.083 | A*24                 | 0.09  | B*18 | 0.02  | DRB1*07 | 0.362 |
| A*25                 | 0.022 | B*40 | 0.061 | DRB1*11 | 0.087 | A*25                 | 0.024 | B*40 | 0.07  | DRB1*11 | 0.377 | A*25                 | 0.03  | B*40 | 0.042 | DRB1*11 | 0.088 | A*25                 | 0.007 | B*40 | 0.032 | DRB1*11 | 0.11  |
| A*01                 | 0.039 | B*15 | 0.056 | DRB1*01 | 0.184 | A*01                 | 0.039 | B*15 | 0.068 | DRB1*01 | 0.043 | A*01                 | 0.419 | B*15 | 0.037 | DRB1*01 | 0.064 | A*01                 | 0.082 | B*15 | 0.061 | DRB1*01 | 0.057 |
| A*03                 | 0.285 | B*37 | 0.005 | DRB1*14 | 0.044 | A*03                 | 0.081 | B*37 | 0.009 | DRB1*14 | 0.075 | A*03                 | 0.083 | B*37 | 0.038 | DRB1*14 | 0.024 | A*03                 | 0.065 | B*37 | 0.011 | DRB1*14 | 0.023 |
| A*68                 | 0.031 | B*39 | 0.006 | DRB1*04 | 0.143 | A*68                 | 0.052 | B*39 | 0.046 | DRB1*04 | 0.114 | A*68                 | 0.033 | B*39 | 0.011 | DRB1*04 | 0.084 | A*68                 | 0.045 | B*39 | 0.024 | DRB1*04 | 0.137 |
| A*23                 | 0.002 | B*13 | 0.001 | DRB1*15 | 0.328 | A*23                 | 0.019 | B*13 | 0     | DRB1*15 | 0.013 | A*23                 | 0.017 | B*13 | 0.001 | DRB1*15 | 0.091 | A*23                 | 0.048 | B*13 | 0.126 | DRB1*15 | 0.054 |
| A*29                 | 0.014 | B*38 | 0.017 | DRB1*13 | 0.094 | A*29                 | 0.006 | B*38 | 0.058 | DRB1*13 | 0.15  | A*29                 | 0.014 | B*38 | 0.021 | DRB1*13 | 0.084 | A*29                 | 0.075 | B*38 | 0.013 | DRB1*13 | 0.133 |
| A*26                 | 0.033 | B*51 | 0.049 | DRB1*08 | 0.024 | A*26                 | 0.073 | B*51 | 0.21  | DRB1*08 | 0.059 | A*26                 | 0.031 | B*51 | 0.033 | DRB1*08 | 0.014 | A*26                 | 0.021 | B*51 | 0.074 | DRB1*08 | 0.033 |
| A*32                 | 0.033 | B*07 | 0.279 | DRB1*03 | 0.004 | A*32                 | 0.073 | B*07 | 0.002 | DRB1*03 | 0.012 | A*32                 | 0.026 | B*07 | 0.058 | DRB1*03 | 0.425 | A*32                 | 0.035 | B*07 | 0.037 | DRB1*03 | 0.017 |
| A*30                 | 0.003 | B*56 | 0.008 | DRB1*16 | 0.013 | A*30                 | 0.006 | B*56 | 0.009 | DRB1*16 | 0.095 | A*30                 | 0.025 | B*56 | 0.002 | DRB1*16 | 0.015 | A*30                 | 0.1   | B*56 | 0.004 | DRB1*16 | 0.026 |
| A*31                 | 0.027 | B*35 | 0.171 | DRB1*10 | 0.009 | A*31                 | 0.035 | B*35 | 0.184 | DRB1*10 | 0.015 | A*31                 | 0.021 | B*35 | 0.058 | DRB1*10 | 0.023 | A*31                 | 0.022 | B*35 | 0.062 | DRB1*10 | 0.02  |
| A*66                 | 0.002 | B*49 | 0.005 | DRB1*09 | 0.006 | A*66                 | 0.004 | B*49 | 0.033 | DRB1*09 | 0.015 | A*66                 | 0.001 | B*49 | 0.018 | DRB1*09 | 0.002 | A*66                 | 0.009 | B*49 | 0.024 | DRB1*09 | 0.01  |
| A*11                 | 0.129 | B*47 | 0.005 |         |       | A*11                 | 0.072 | B*47 | 0.004 |         |       | A*11                 | 0.036 | B*47 | 0.003 |         |       | A*11                 | 0.027 | B*47 | 0.006 |         |       |
| A*69                 | 0.001 | B*08 | 0     |         |       | A*69                 | 0.006 | B*08 | 0     |         |       | A*69                 | 0.002 | B*08 | 0.349 |         |       | A*69                 | 0.002 | B*08 | 0     |         |       |
| A*33                 | 0.047 | B*57 | 0.006 |         |       | A*33                 | 0.006 | B*57 | 0.001 |         |       | A*33                 | 0.028 | B*57 | 0.05  |         |       | A*33                 | 0.015 | B*57 | 0.064 |         |       |
| A*34                 | 0.001 | B*27 | 0.043 |         |       | A*34                 | 0     | B*27 | 0.037 |         |       | A*34                 | 0.001 | B*27 | 0.011 |         |       | A*34                 | 0.003 | B*27 | 0.026 |         |       |
| A*74                 | 0     | B*41 | 0.001 |         |       | A*74                 | 0.003 | B*41 | 0.015 |         |       | A*74                 | 0     | B*41 | 0.013 |         |       | A*74                 | 0     | B*41 | 0.037 |         |       |
| A*43                 | 0     | B*55 | 0.026 |         |       | A*43                 | 0     | B*55 | 0.027 |         |       | A*43                 | 0     | B*55 | 0.011 |         |       | A*43                 | 0     | B*55 | 0.005 |         |       |
| A*36                 | 0     | B*14 | 0.066 |         |       | A*36                 | 0     | B*14 | 0.001 |         |       | A*36                 | 0.001 | B*14 | 0.027 |         |       | A*36                 | 0     | B*14 | 0.031 |         |       |
| A*80                 | 0     | B*50 | 0.002 |         |       | A*80                 | 0     | B*50 | 0.001 |         |       | A*80                 | 0.001 | B*50 | 0.019 |         |       | A*80                 | 0     | B*50 | 0.051 |         |       |
|                      |       | B*58 | 0.014 |         |       |                      |       | B*58 | 0.013 |         |       |                      |       | B*58 | 0.029 |         |       |                      |       | B*58 | 0.011 |         |       |
|                      |       | B*45 | 0     |         |       |                      |       | B*45 | 0.001 |         |       |                      |       | B*45 | 0.001 |         |       |                      |       | B*45 | 0.021 |         |       |
|                      |       | B*53 | 0.001 |         |       |                      |       | B*53 | 0.003 |         |       |                      |       | B*53 | 0.009 |         |       |                      |       | B*53 | 0.017 |         |       |
|                      |       | B*52 | 0.066 |         |       |                      |       | B*52 | 0.001 |         |       |                      |       | B*52 | 0.018 |         |       |                      |       | B*52 | 0.007 |         |       |
|                      |       | B*48 | 0     |         |       |                      |       | B*48 | 0.002 |         |       |                      |       | B*48 | 0     |         |       |                      |       | B*48 | 0.008 |         |       |
|                      |       | B*73 | 0     |         |       |                      |       | B*73 | 0.002 |         |       |                      |       | B*73 | 0.002 |         |       |                      |       | B*73 | 0.004 |         |       |
|                      |       | B*82 | 0     |         |       |                      |       | B*82 | 0     |         |       |                      |       | B*82 | 0     |         |       |                      |       | B*82 | 0     |         |       |
|                      |       | B*78 | 0     |         |       |                      |       | B*78 | 0.001 |         |       |                      |       | B*78 | 0     |         |       |                      |       | B*78 | 0     |         |       |
|                      |       | B*54 | 0     |         |       |                      |       | B*54 | 0     |         |       |                      |       | B*54 | 0     |         |       |                      |       | B*54 | 0.001 |         |       |
|                      |       | B*42 | 0     |         |       |                      |       | B*42 | 0     |         |       |                      |       | B*42 | 0.001 |         |       |                      |       | B*42 | 0.004 |         |       |
|                      |       | B*46 | 0     |         |       |                      |       | B*46 | 0.003 |         |       |                      |       | B*46 | 0     |         |       |                      |       | B*46 | 0     |         |       |
|                      |       | B*81 | 0     |         |       |                      |       | B*81 | 0     |         |       |                      |       | B*81 | 0     |         |       |                      |       | B*81 | 0     |         |       |
