# Supplementary material
Source: publisher figshare collection journal article supplement (https://karger.figshare.com/articles/dataset/_/4747909)
Supplement: Supplementary file 1 [file 1 › Supple Tab 4.PDF]

**Table S4a:** Regression of gene diversity on latitude (1st field)

|               | Estimate   | Std.Error | tvalue | p-value     |
|---------------|------------|-----------|--------|-------------|
| Intercepts    |            |           |        |             |
| A             | 9.849E-01  | 1.518E-02 | 64.885 | <2e-16***   |
| B             | 9.373E-01  | 1.518E-02 | 61.752 | <2e-16***   |
| C             | 9.857E-01  | 2.843E-02 | 34.676 | <2e-16***   |
| DQA1          | 6.374E-01  | 3.015E-02 | 21.146 | <2e-16***   |
| DQB1          | 5.938E-01  | 2.355E-02 | 25.217 | <2e-16***   |
| DRB1          | 8.811E-01  | 1.174E-02 | 75.056 | <2e-16***   |
| Coefficients  |            |           |        |             |
| A:latitude    | -2.795E-03 | 3.341E-04 | -8.364 | 2.87e-15*** |
| B:latitude    | -3.246E-04 | 3.341E-04 | -0.971 | 0.332       |
| C:latitude    | -2.748E-03 | 5.927E-04 | -4.637 | 5.43e-06*** |
| DQA1:latitude | 9.721E-04  | 6.377E-04 | 1.524  | 0.129       |
| DQB1:latitude | 3.050E-03  | 5.107E-04 | 5.973  | 7.03e-09*** |
| DRB1:latitude | 4.877E-06  | 2.471E-04 | 0.02   | 0.984       |

Signif.codes: 0 '\*\*\*' 0.001 '\*\*' 0.01 '\*' 0.05

Adjusted R-squared: 0.9996; global F-statistic p -value: <2.2e-16

**Table S4b:** Regression of gene diversity on latitude (2nd field)

|               | Estimate   | Std.Error | tvalue | p-value   |
|---------------|------------|-----------|--------|-----------|
| Intercepts    |            |           |        |           |
| A             | 9.994E-01  | 3.868E-02 | 25.839 | <2e-16*** |
| B             | 9.739E-01  | 3.791E-02 | 25.692 | <2e-16*** |
| C             | 9.873E-01  | 4.911E-02 | 20.106 | <2e-16*** |
| DPB1          | 8.406E-01  | 4.431E-02 | 18.969 | <2e-16*** |
| DQA1          | 6.530E-01  | 5.973E-02 | 10.933 | <2e-16*** |
| DQB1          | 7.700E-01  | 3.804E-02 | 20.243 | <2e-16*** |
| DRB1          | 9.537E-01  | 3.481E-02 | 27.398 | <2e-16*** |
| Coefficients  |            |           |        |           |
| A:latitude    | -2.881E-03 | 8.146E-04 | -3.537 | 0.0006*** |
| B:latitude    | -7.241E-04 | 8.046E-04 | -0.9   | 0.370     |
| C:latitude    | -1.518E-03 | 1.047E-03 | -1.449 | 0.150     |
| DPB1:latitude | -9.023E-04 | 9.315E-04 | -0.969 | 0.335     |
| DQA1:latitude | 3.614E-03  | 1.332E-03 | 2.713  | 0.0078**  |
| DQB1:latitude | 2.065E-03  | 8.398E-04 | 2.459  | 0.0155*   |
| DRB1:latitude | -6.223E-04 | 7.490E-04 | -0.831 | 0.408     |

Signif.codes: 0 '\*\*\*' 0.001 '\*\*' 0.01 '\*' 0.05

Adjusted R-squared: 0.9993; global F-statistic p-value: < 2.2e-16

**Table S4c:** Regression of haplotype frequencies on latitude and longitude (1st-field)

|                    | Estimate   | Std.Error | tvalue | p-value     |
|--------------------|------------|-----------|--------|-------------|
| Intercepts         |            |           |        |             |
| A*01~B*08          | -9.934E-02 | 2.047E-02 | -4.854 | 2.14e-06*** |
| A*02~B*44          | 2.188E-02  | 2.047E-02 | 1.069  | 0.286       |
| A*02~B*51          | 1.244E-01  | 2.047E-02 | 6.075  | 4.58e-09*** |
| A*03~B*07          | -1.241E-01 | 2.047E-02 | -6.061 | 4.95e-09*** |
| A*03~B*35          | -4.207E-02 | 2.047E-02 | -2.055 | 0.041*      |
| Coefficients       |            |           |        |             |
| A*01~B*08:Lat      | 3.443E-03  | 4.723E-04 | 7.29   | 4.07e-12*** |
| A*02~B*44:Lat      | 6.184E-04  | 4.723E-04 | 1.309  | 0.192       |
| A*02~B*51:Lat      | -1.896E-03 | 4.723E-04 | -4.015 | 7.85e-05*** |
| A*03~B*07:Lat      | 3.661E-03  | 4.723E-04 | 7.751  | 2.29e-13*** |
| A*03~B*35:Lat      | 1.521E-03  | 4.723E-04 | 3.22   | 0.0015**    |
| A*01~B*08:Long     | 1.616E-03  | 7.315E-04 | 2.21   | 0.0281*     |
| A*02~B*44:Long     | -4.035E-04 | 7.315E-04 | -0.552 | 0.582       |
| A*02~B*51:Long     | -9.019E-04 | 7.315E-04 | -1.233 | 0.219       |
| A*03~B*07:Long     | 1.188E-03  | 7.315E-04 | 1.624  | 0.106       |
| A*03~B*35:Long     | -1.119E-03 | 7.315E-04 | -1.53  | 0.127       |
| Interactions       |            |           |        |             |
| A*01~B*08:Lat:Long | -4.818E-05 | 1.567E-05 | -3.076 | 0.0023**    |
| A*02~B*44:Lat:Long | -2.956E-06 | 1.567E-05 | -0.189 | 0.851       |
| A*02~B*51:Lat:Long | 2.022E-05  | 1.567E-05 | 1.291  | 0.198       |
| A*03~B*07:Lat:Long | -3.281E-05 | 1.567E-05 | -2.094 | 0.0372*     |
| A*03~B*35:Lat:Long | 2.359E-05  | 1.567E-05 | 1.505  | 0.133       |

Signif.codes: 0 '\*\*\*' 0.001 '\*\*' 0.01 '\*' 0.05

Adjusted R-squared: 0.8858; F-statistic: p-value: < 2.2e-16
