# Supplementary material
Source: publisher figshare collection journal article supplement (https://karger.figshare.com/articles/dataset/_/4747909)
Supplement: Supplementary file 1 [file 1 › Supple Tab 5.pdf]

**Table S5:** Geographic coordinates of the populations analyzed on Figure 4

| Population                | Latitude | Longitude |
|---------------------------|----------|-----------|
| Albanians                 | 41       | 20        |
| Austrians-Oetztal         | 47.08    | 10.91     |
| Austrians-Vienna          | 48.21    | 16.36     |
| Bashkirs                  | 54.53    | 60.33     |
| British-Wales             | 52.5     | -3.5      |
| Croatians                 | 45.48    | 15.58     |
| Croatians                 | 45.81    | 15.97     |
| Cypriots                  | 35.17    | 33.4      |
| Czechs                    | 50       | 14.3      |
| Czechs                    | 50.088   | 14.42     |
| Finns                     | 60.13    | 25        |
| Finns                     | 60.2     | 25.1      |
| Finns-BMD                 | 60.13    | 25        |
| Finns-CB                  | 60.13    | 25        |
| French                    | 45.76    | 4.84      |
| French-Montpellier        | 43.61    | 3.87      |
| Greek-Cypriots            | 35       | 33.3      |
| Greeks                    | 37.967   | 23.717    |
| Greeks                    | 38       | 23.44     |
| Greeks                    | 39       | 22        |
| Irish                     | 54.7     | -6.7      |
| Kosovo-Albanians          | 42.58    | 21        |
| Macedonians               | 41.83    | 22        |
| Northern-Italians         | 45.47    | 9.17      |
| Portuguese-Azores         | 38.5     | -28       |
| Portuguese-Aveiro         | 40.633   | -8.65     |
| Portuguese-Braga          | 41.55    | -8.433    |
| Portuguese-Braganca       | 41.817   | -6.75     |
| Portuguese-Castelo-Branco | 39.817   | -7.5      |
| Portuguese-Coimbra        | 40.2     | -8.417    |
| Portuguese-Evora          | 38.567   | -7.9      |
| Portuguese-Faro           | 37.017   | -7.933    |
| Portuguese-Leiria         | 39.75    | -8.8      |
| Portuguese-Lisboa         | 38.733   | -9.133    |
| Portuguese-Portalegre     | 39.283   | -7.417    |
| Portuguese-Porto          | 41.167   | -8.583    |

| Population           | Latitude | Longitude |
|----------------------|----------|-----------|
| Portuguese-Santarem  | 39.233   | -8.667    |
| Portuguese-Setubal   | 38.35    | -8.9      |
| Portuguese-Vila-Real | 41.333   | -7.75     |
| Portuguese-Viseu     | 40.667   | -7.917    |
| Russians             | 54.53    | 60.33     |
| Russians-Vologda     | 60.05    | 40.94     |
| Slovenian-Donors     | 46.05    | 14.5      |
| Slovenians           | 46.05    | 14.5      |
| Slovenians-CB        | 46.05    | 14.5      |
| Swiss-BMD-BE         | 46.95    | 7.433     |
| Swiss-BMD-GE         | 46.217   | 6.15      |
| Swiss-BMD-GR         | 46.867   | 9.533     |
| Swiss-BMD-LG         | 46.017   | 8.95      |
| Swiss-BMD-LS         | 46.533   | 6.65      |
| Swiss-BMD-LU         | 47.05    | 8.283     |
| Swiss-BMD-SG         | 47.417   | 9.383     |
| Swiss-BMD-SI         | 46.233   | 7.35      |
| Tatars               | 54.53    | 60.33     |
