# Supplementary material
Source: publisher figshare collection journal article supplement (https://karger.figshare.com/articles/dataset/_/4747909)
Supplement: Supplementary file 1 [file 1 › Supple Tab 6.PDF]

**Table S6:** Global linkage disequilibrium between loci

| Loci     | N  | LRTp < 0.05 | PRSq > 9500 | LRTp < 0.001 | PRSq > 9900 |
|----------|----|-------------|-------------|--------------|-------------|
| AB       | 72 | 29          | 52          | 28           | 46          |
| ADRB1    | 60 | 26          | 34          | 24           | 32          |
| BC       | 41 | 31          | 38          | 30           | 38          |
| BDRB1    | 62 | 42          | 56          | 34           | 53          |
| DQA1DQB1 | 24 | 24          | 24          | 24           | 24          |
| DRB1DQB1 | 52 | 52          | 52          | 52           | 52          |

N: number of population tested

LRTp: likelihood-ratio test p-value

PRSq: parametric resampling quantile (10000 simulations)
