# Supplementary material
Source: publisher figshare collection journal article supplement (https://karger.figshare.com/articles/dataset/_/4747909)

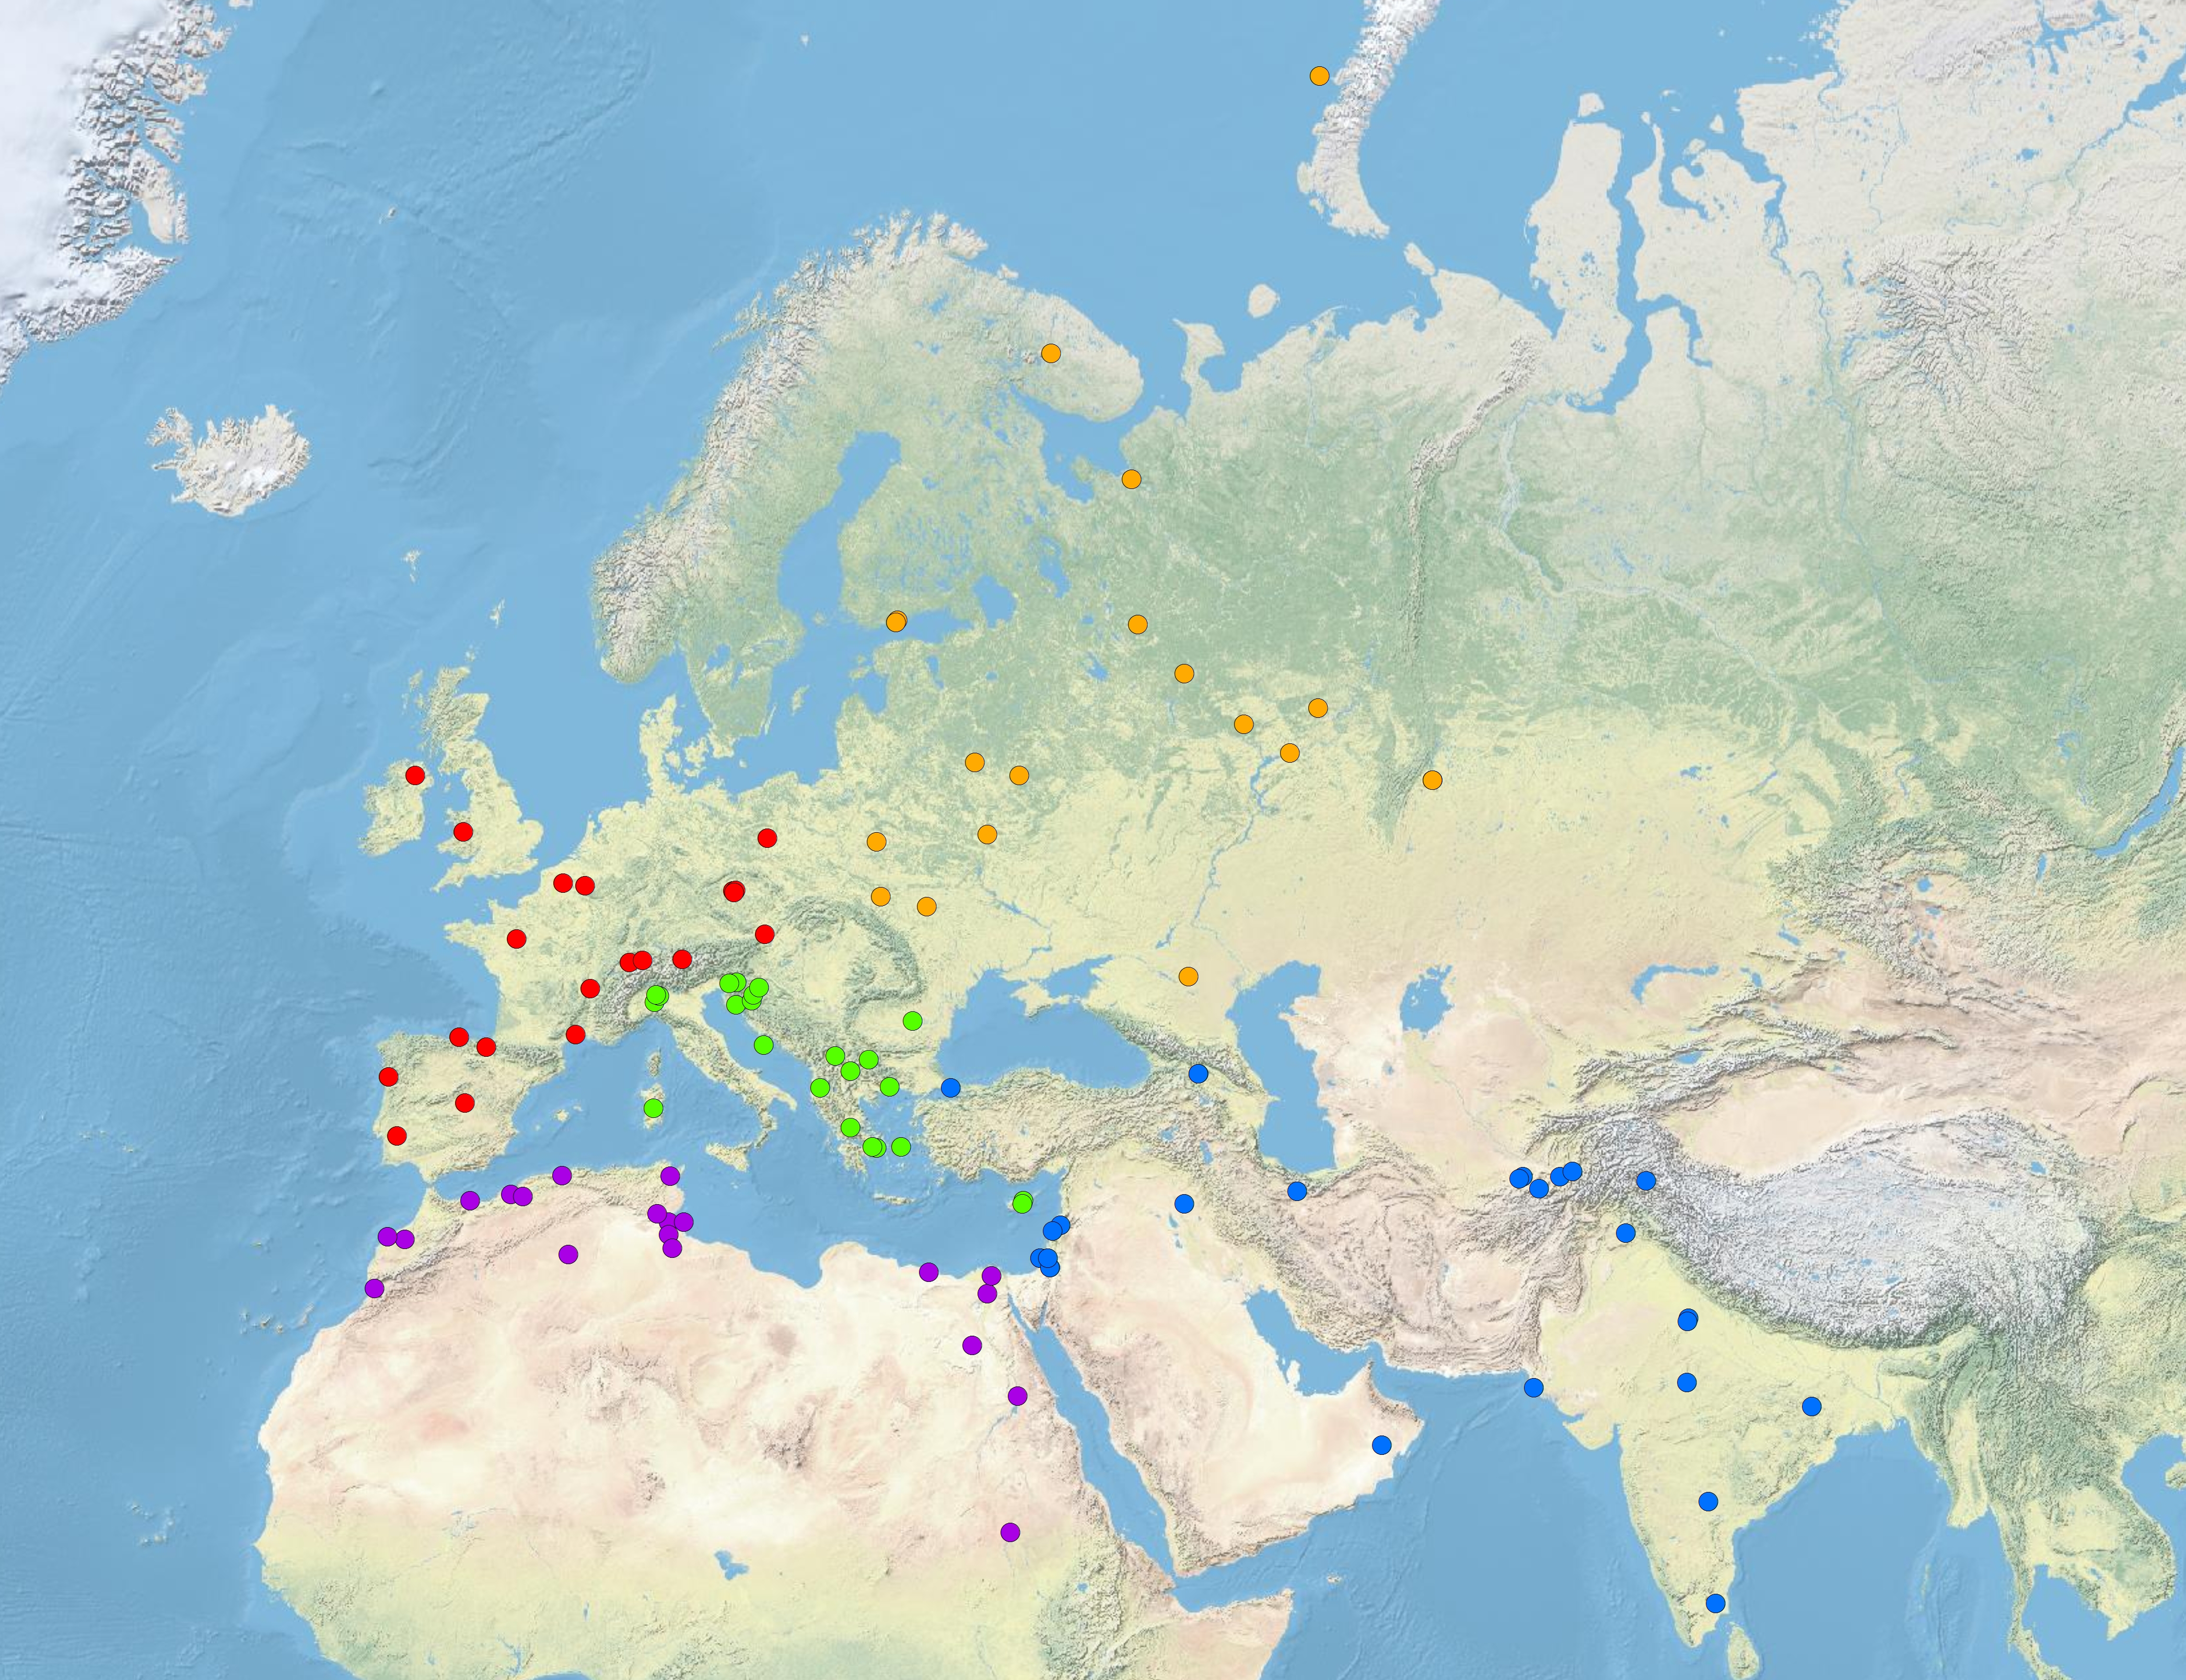

Supplement: Supplementary file 1 [file 1 › Supple Fig 1.jpg]

**minimum adjusted p-values**

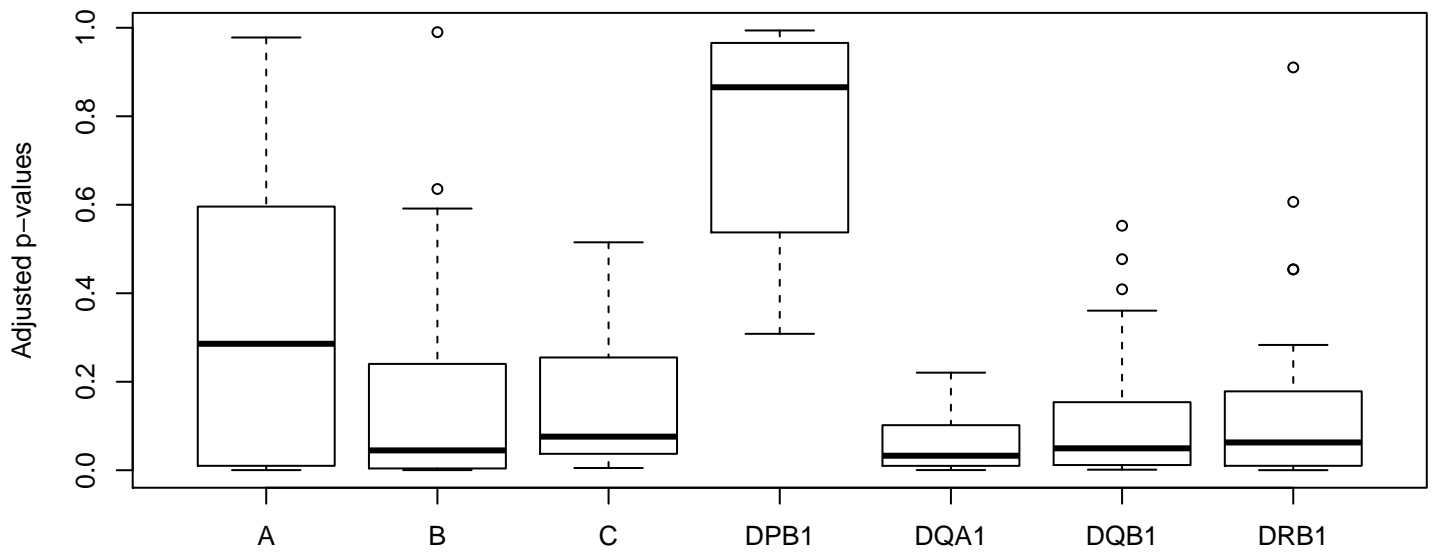

**maximum adjusted p-values**

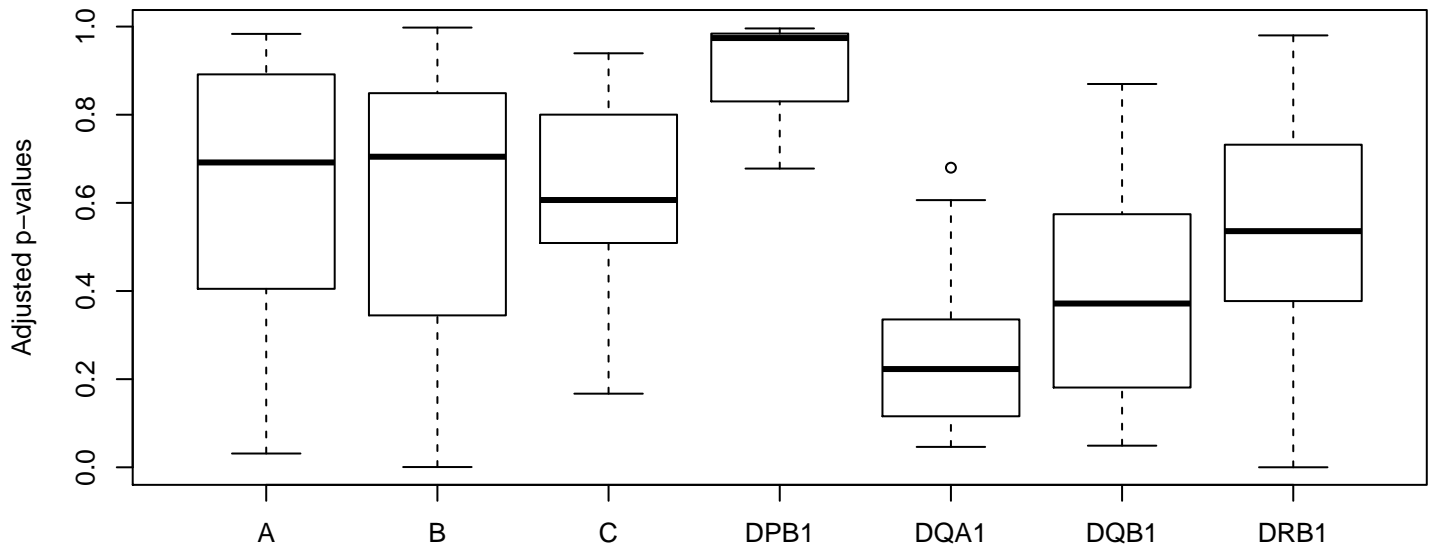

Supplement: Supplementary file 1 [file 1 › Supple Fig 2.pdf]

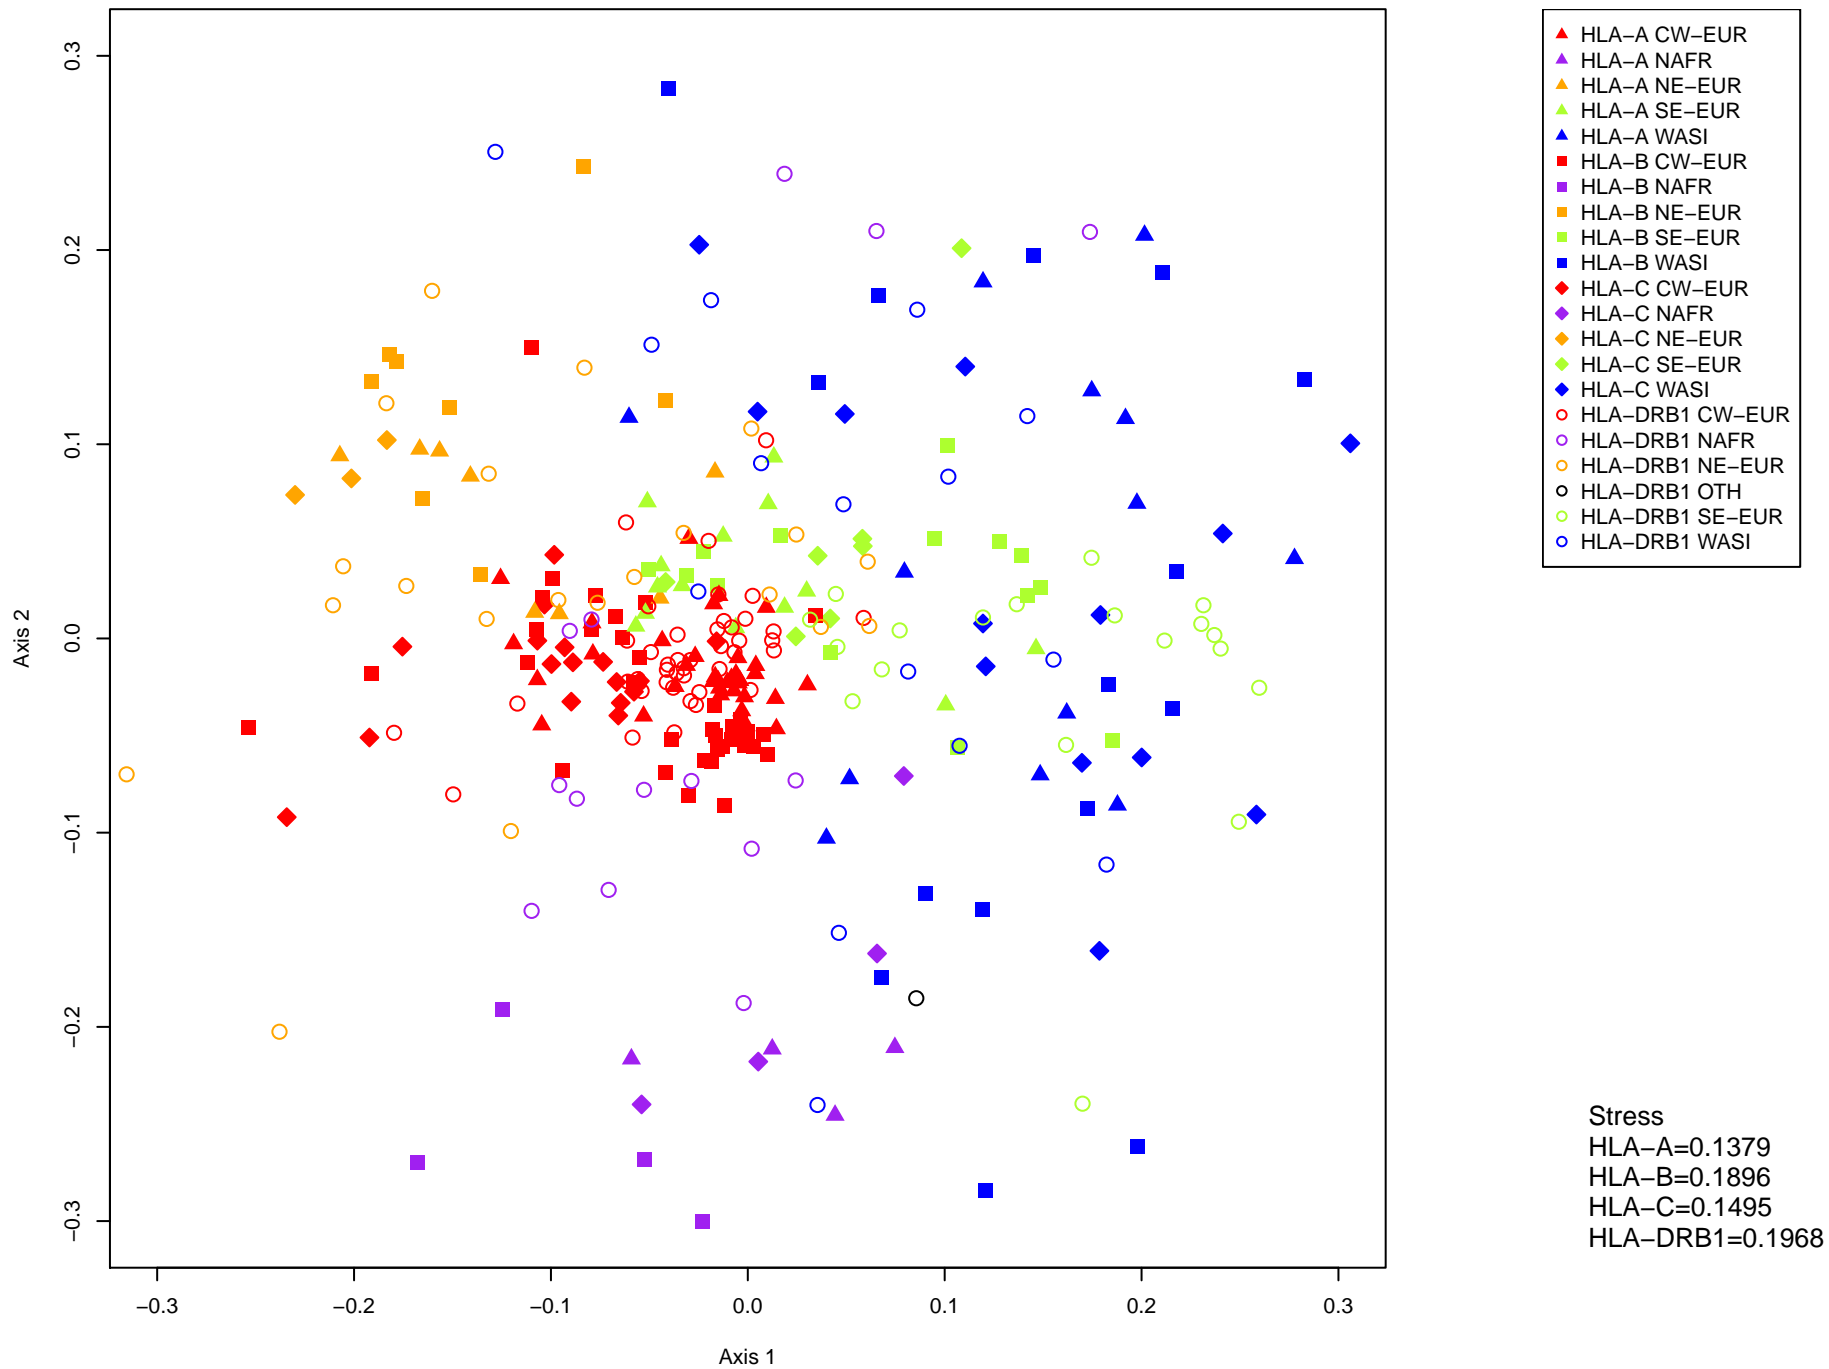

Supplement: Supplementary file 1 [file 1 › Supple Fig 3a.pdf]

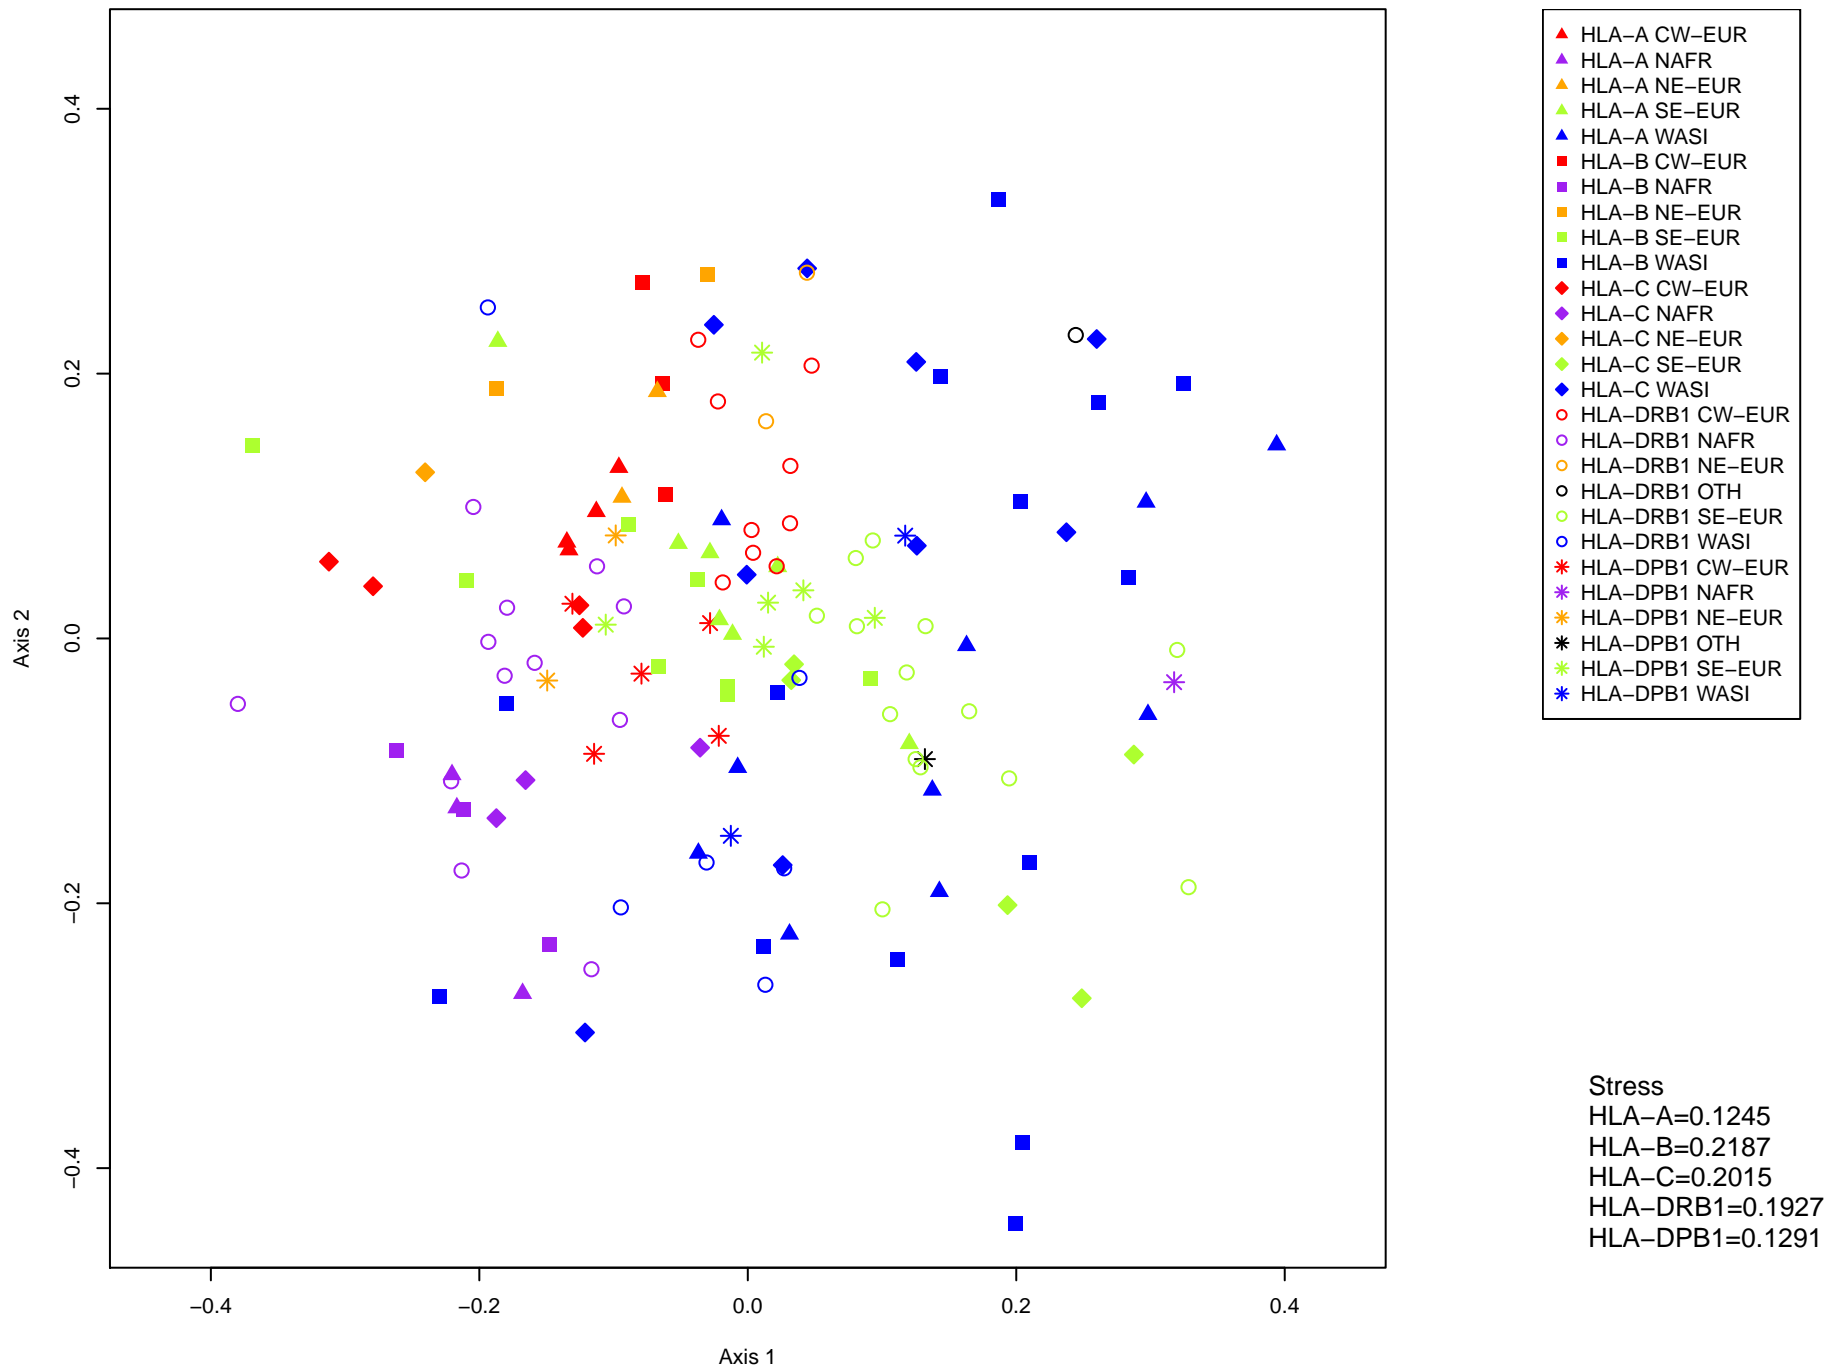

Supplement: Supplementary file 1 [file 1 › Supple Fig 3b.pdf]

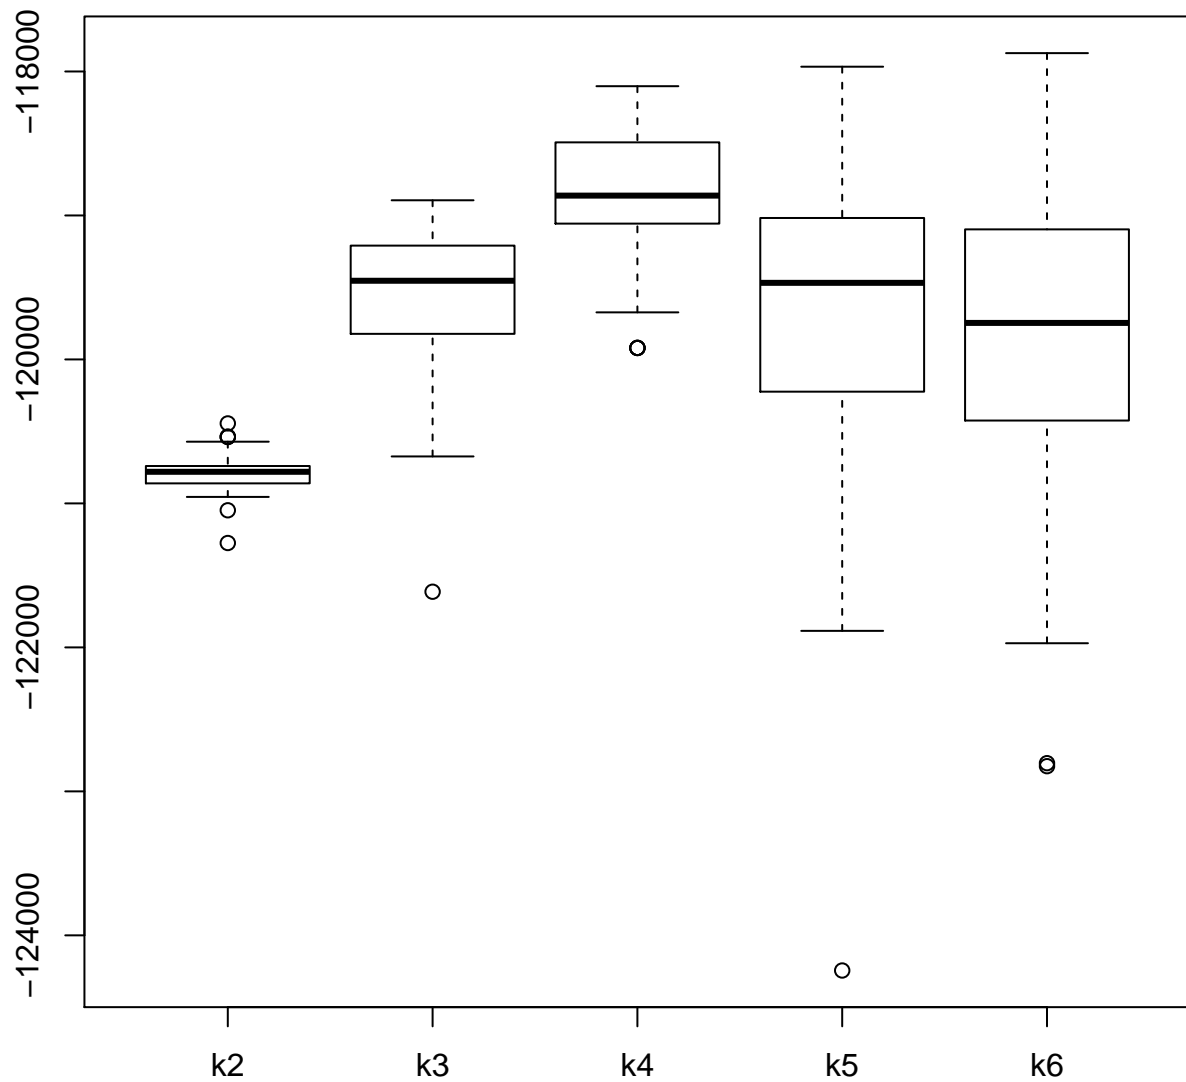

Supplement: Supplementary file 1 [file 1 › Supple Fig 4.pdf]

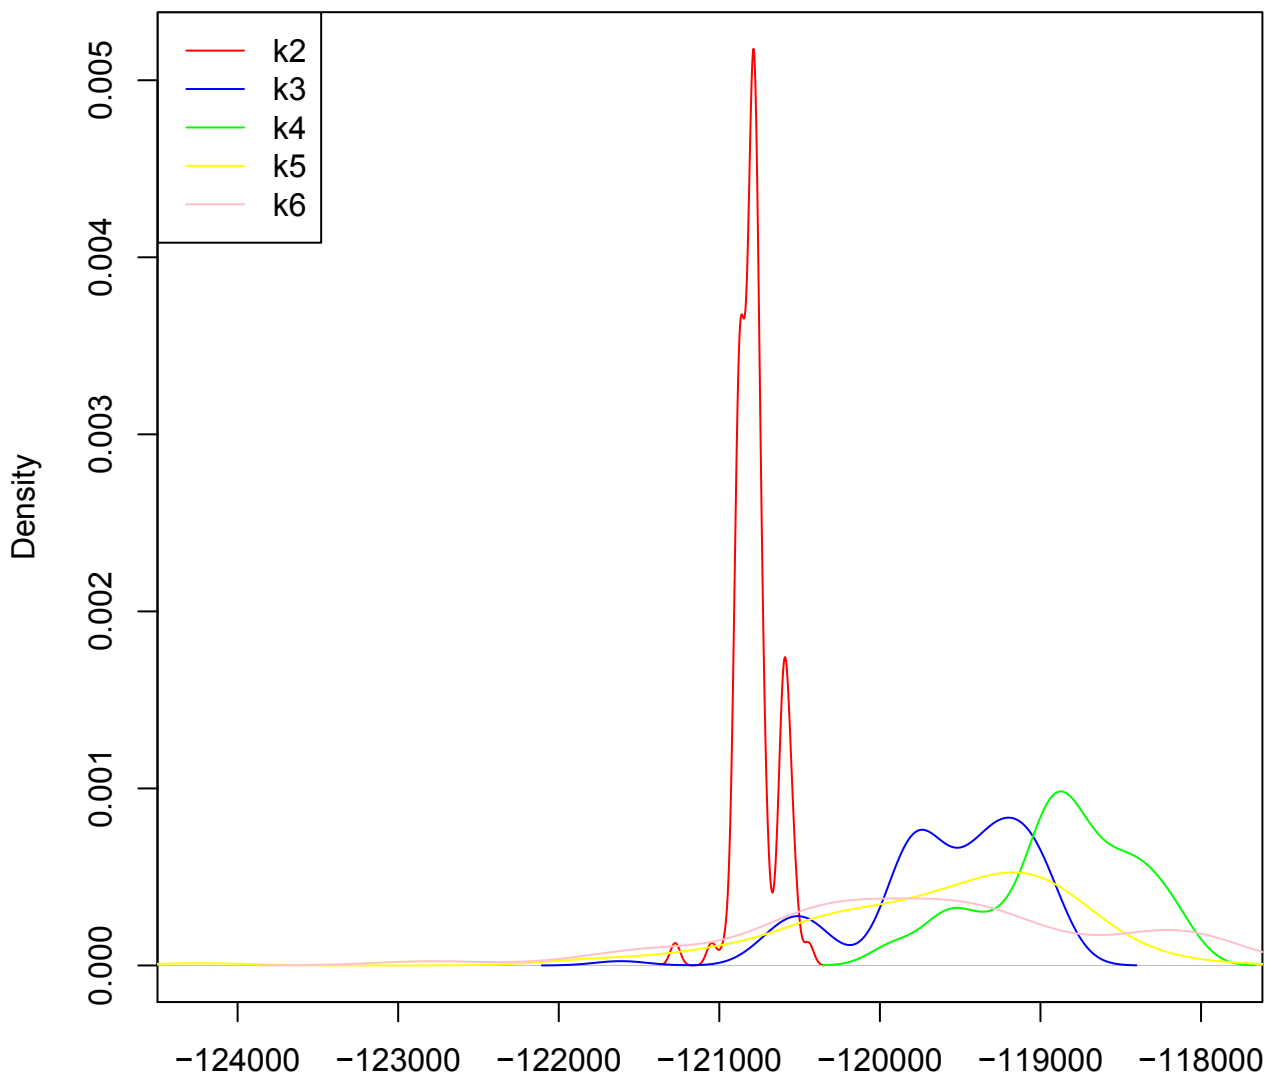

Supplement: Supplementary file 1 [file 1 › Supple Fig 5.pdf]

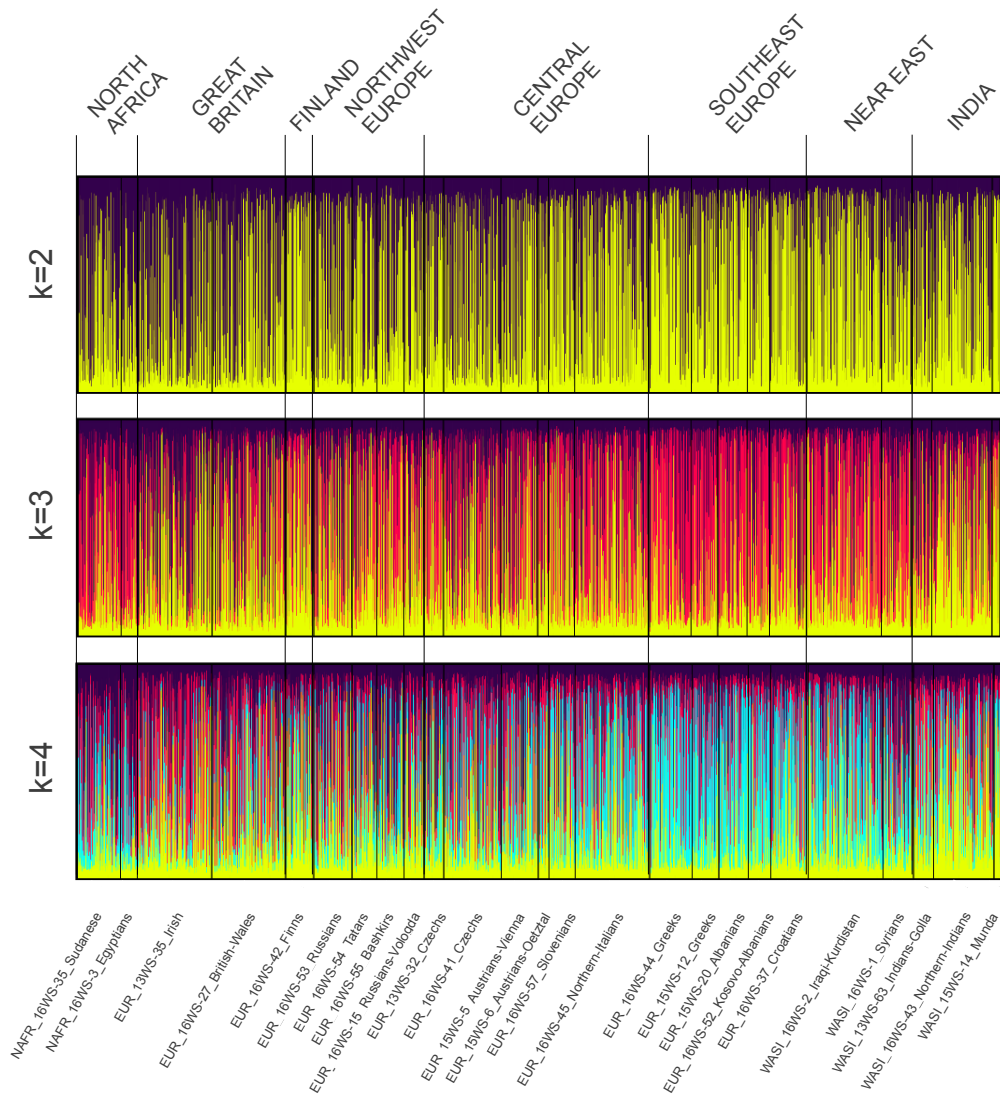

Supplement: Supplementary file 1 [file 1 › Supple Fig 6.pdf]

likelihood-ratio test (LRT)

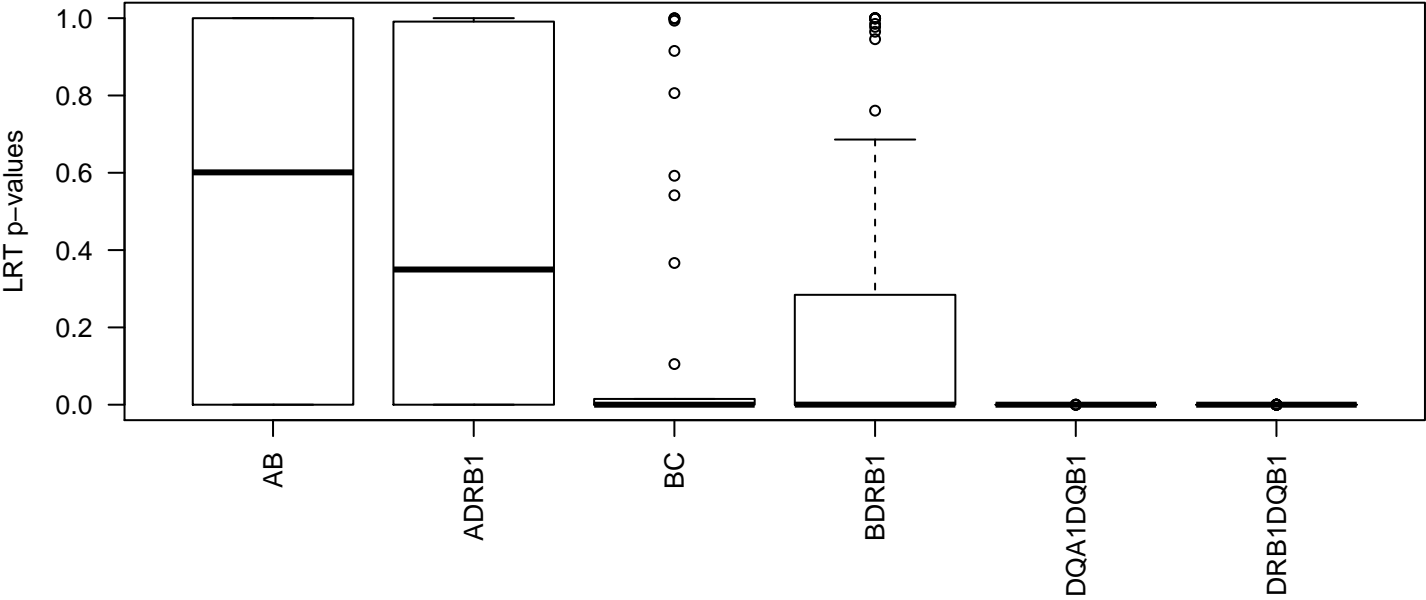

parametric resampling (PRS, r = 10000)

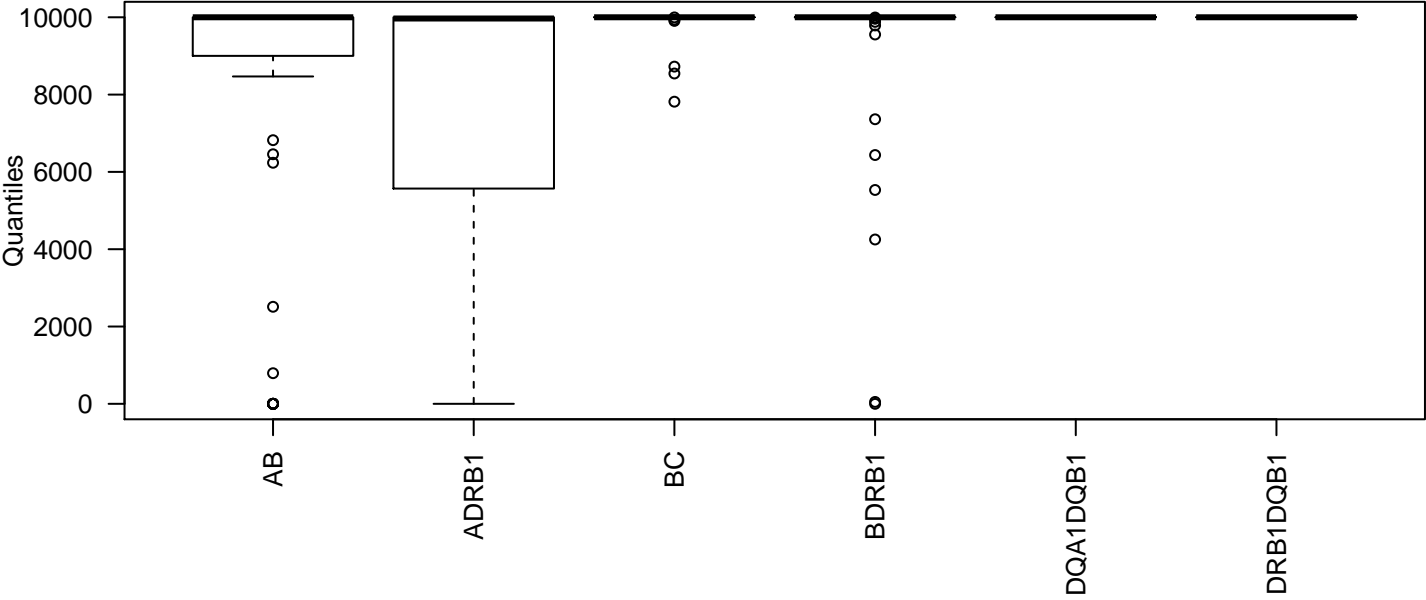

Supplement: Supplementary file 1 [file 1 › Supple Fig 7.pdf]

**Haplotype A\*01~B\*08**

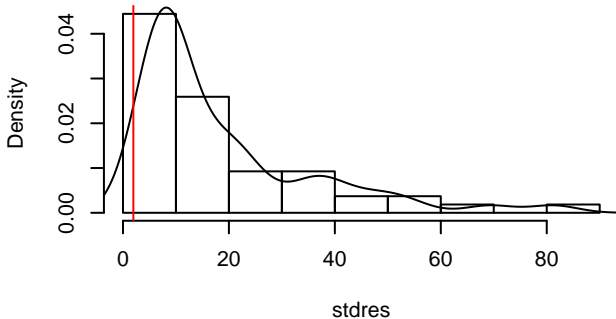

**Haplotype A\*02~B\*44**

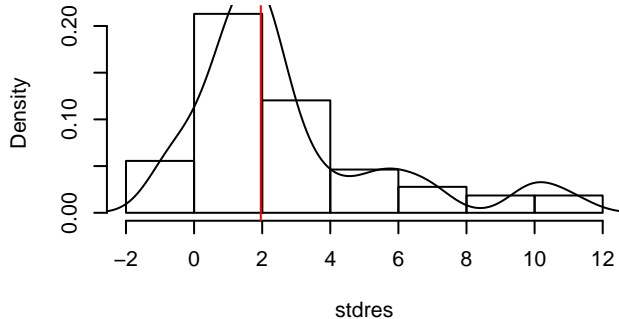

**Haplotype A\*02~B\*51**

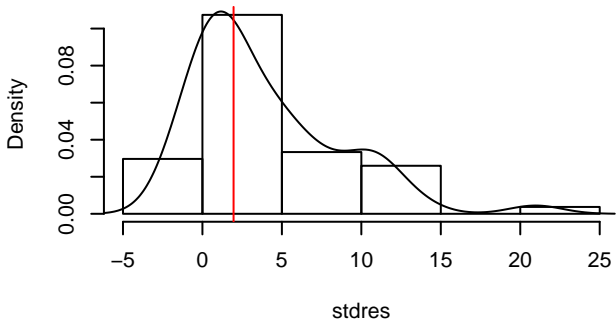

**Haplotype A\*03~B\*07**

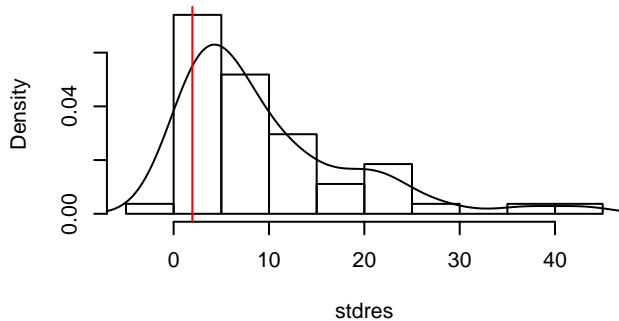

**Haplotype A\*03~B\*35**

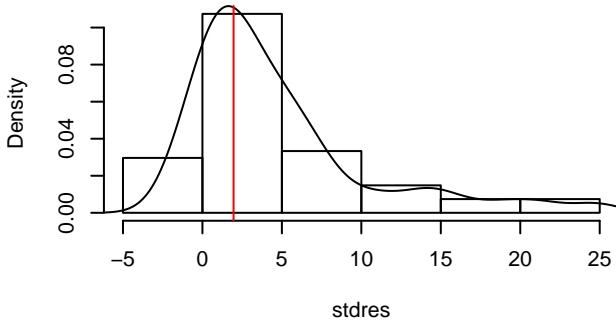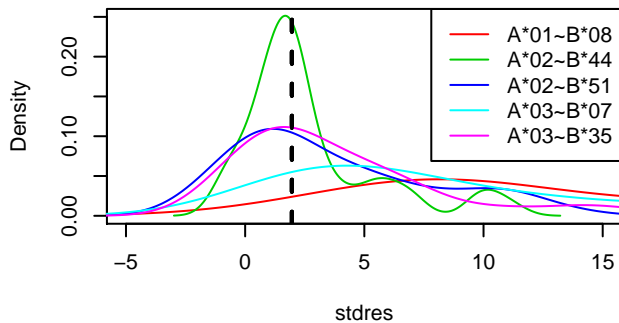

Supplement: Supplementary file 1 [file 1 › Supple Fig 8.pdf]

**HLA-A\*23**

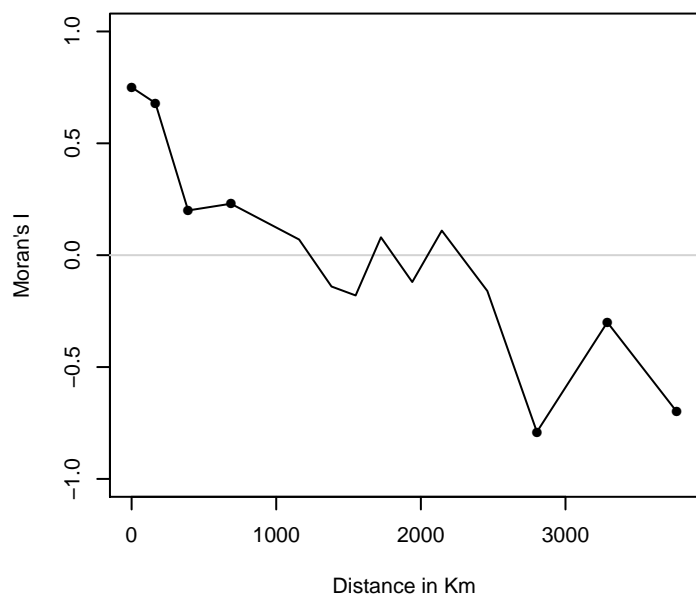

**HLA-A\*24**

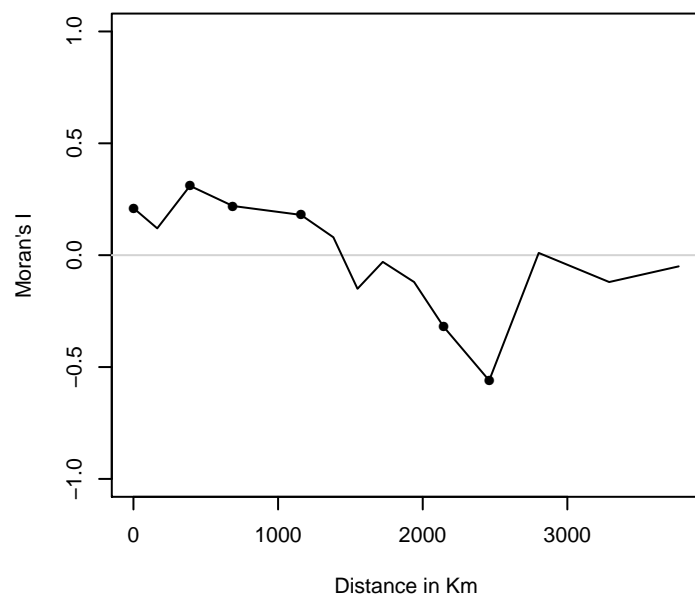

**HLA-B\*14**

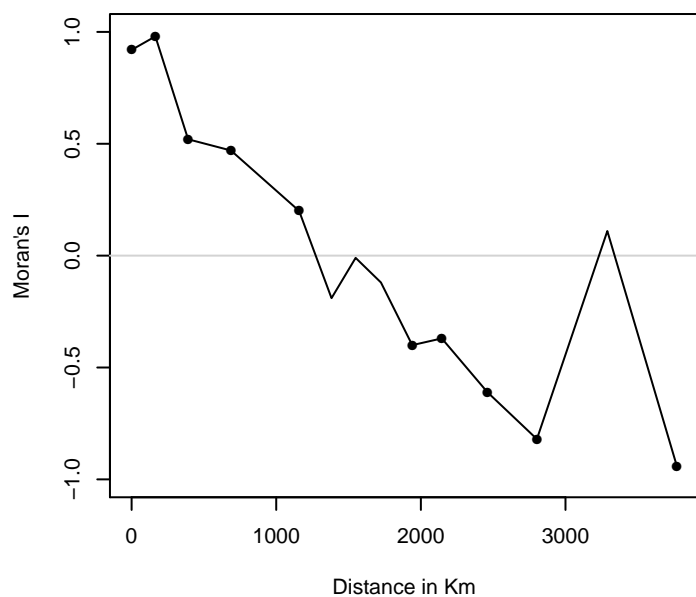

**HLA-B\*44**

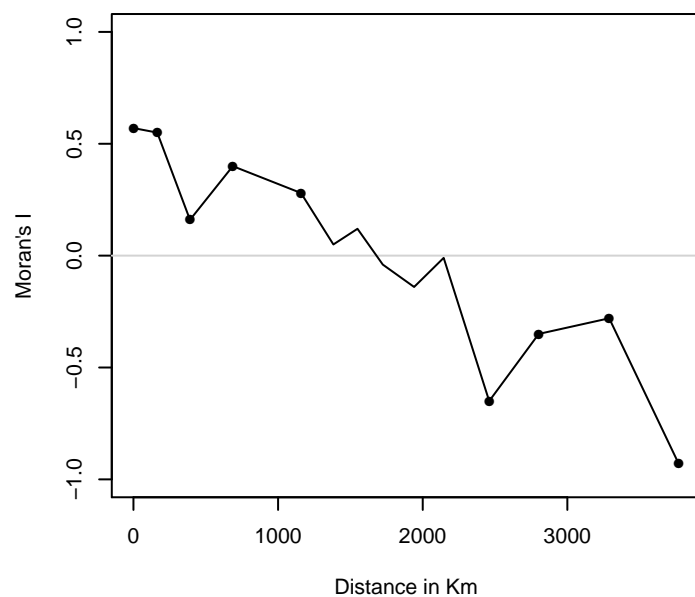

**HLA-DRB1\*15**

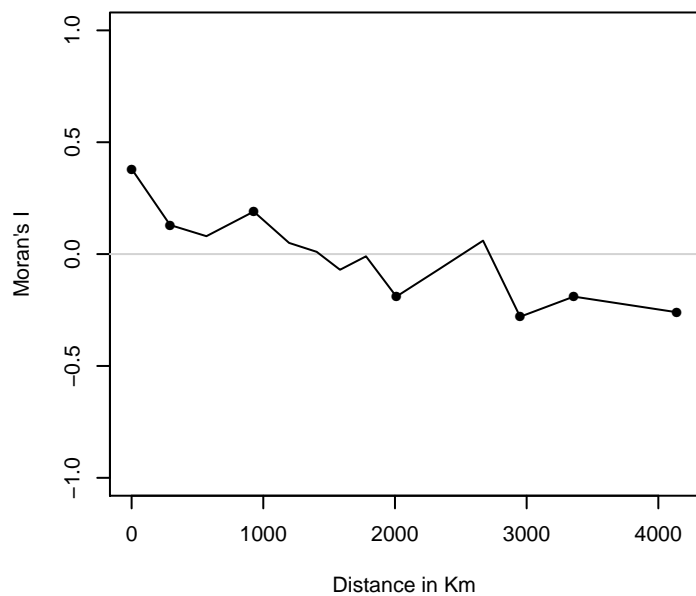

**HLA-DRB1\*16**

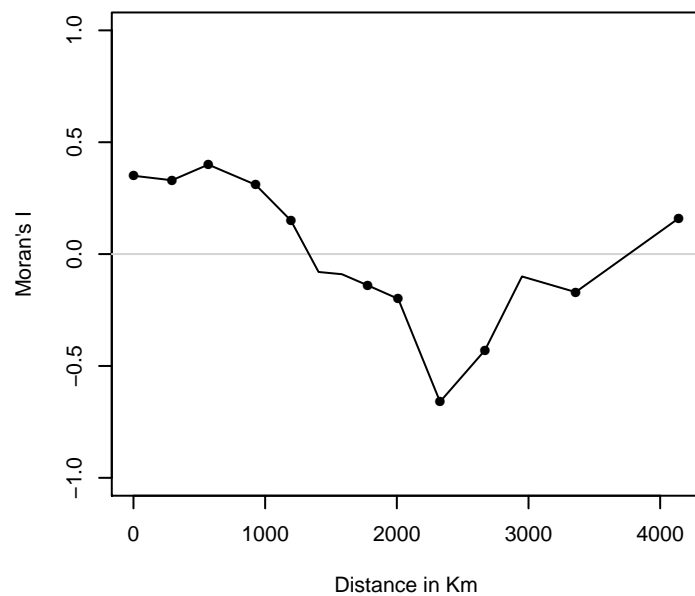

Supplement: Supplementary file 1 [file 1 › Supple Fig 9.pdf]
